# Supplementary material for: Solvent Coordination Effect on Copper-Based Molecular Catalysts for Controlled Radical Polymerization
Source: MDPI journal article supplement (doi:10.3390/catal12121656), 2022-12-16
Supplement: s1 [file s1]

# Solvent Coordination Effect on Copper-Based Catalysts for Controlled Radical Polymerization

Stefano Racioppi<sup>1,2</sup>, Laura Orian<sup>1,\*</sup>, Cristina Tubaro<sup>1</sup>, Armando Gennaro<sup>1,†</sup>, Abdirisak Ahmed Isse<sup>1,\*</sup>

<sup>1</sup> Dipartimento di Scienze Chimiche, Università degli Studi di Padova, Via Marzolo 1, 35131 Padova Italy

<sup>2</sup> Department of Chemistry, State University of New York at Buffalo, Buffalo, NY, 14260-3000, USA

\* Correspondence: [laura.orian@unipd.it](mailto:laura.orian@unipd.it) (L.O.), [abdirisak.ahmedisse@unipd.it](mailto:abdirisak.ahmedisse@unipd.it) (A.A.I)

† Deceased on April 13, 2022

## Contents

|                                                                                                                         |           |
|-------------------------------------------------------------------------------------------------------------------------|-----------|
| <b>Orbital, Geometry and Energy Details.....</b>                                                                        | <b>1</b>  |
| <i>Coordinates of the copper(I) complexes [Cu<sup>I</sup>L]<sup>+</sup> .....</i>                                       | <i>5</i>  |
| <i>Coordinates of the copper(I) complexes with coordinated solvent molecules [Cu<sup>I</sup>LS]<sup>+</sup> .....</i>   | <i>2</i>  |
| <i>Coordinates of the copper(II) complexes [Cu<sup>II</sup>L]<sup>+</sup> .....</i>                                     | <i>8</i>  |
| <i>Coordinates of the copper(II) complexes with coordinated solvent molecules [Cu<sup>II</sup>LS]<sup>2+</sup> ....</i> | <i>9</i>  |
| <i>Coordinates of the copper(II) complexes [Cu<sup>II</sup>LX]<sup>+</sup> (X=Cl, Br) .....</i>                         | <i>14</i> |
| <i>Coordinates of the copper(II) complexes [Cu<sup>II</sup>(PMDETA)SX]<sup>+</sup> (X=Cl, Br) .....</i>                 | <i>16</i> |
| <i>Coordinates of the species Cu<sup>I,II</sup> and Cu<sup>I,II</sup>S .....</i>                                        | <i>21</i> |
| <i>Coordinates of initiators RX and radicals R<sup>•</sup> and X<sup>•</sup> .....</i>                                  | <i>22</i> |

## Orbital, Geometry and Energy Details

**Table S1.** Cu-ligand relative contribution in the HOMO-LUMO orbitals of [Cu<sup>I</sup>(Me<sub>6</sub>TREN)]<sup>+</sup>, [Cu<sup>I</sup>(PMDETA)]<sup>+</sup> and [Cu<sup>I</sup>(TPMA)]<sup>+</sup>, calculated at different levels of theory.

|                           | [Cu <sup>I</sup> (Me <sub>6</sub> TREN)] <sup>+</sup> |        | [Cu <sup>I</sup> (PMDETA)] <sup>+</sup> |        | [Cu <sup>I</sup> (Me <sub>6</sub> TREN)] <sup>+</sup> |        |
|---------------------------|-------------------------------------------------------|--------|-----------------------------------------|--------|-------------------------------------------------------|--------|
|                           | Cu                                                    | ligand | Cu                                      | ligand | Cu                                                    | ligand |
| <b>M06/6-311+G(d,p)</b>   |                                                       |        |                                         |        |                                                       |        |
| LUMO                      | 100                                                   | 0      | 78                                      | 22     | 0                                                     | 100    |
| HOMO                      | 55                                                    | 45     | 50                                      | 50     | 54                                                    | 46     |
| <b>B3LYP/6-311+G(d,p)</b> |                                                       |        |                                         |        |                                                       |        |
| LUMO                      | 100                                                   | 0      | 98                                      | 2      | 2                                                     | 98     |
| HOMO                      | 64                                                    | 36     | 58                                      | 42     | 57                                                    | 43     |
| <b>M06/CC-PVTZ</b>        |                                                       |        |                                         |        |                                                       |        |
| LUMO                      | 92                                                    | 8      | 92                                      | 8      | 1                                                     | 99     |
| HOMO                      | 59                                                    | 41     | 50                                      | 50     | 60                                                    | 40     |
| <b>B3LYP/CC-PVTZ</b>      |                                                       |        |                                         |        |                                                       |        |
| LUMO                      | 77                                                    | 23     | 83                                      | 17     | 1                                                     | 99     |
| HOMO                      | 68                                                    | 32     | 57                                      | 43     | 66                                                    | 34     |

**Table S2.** Interatomic distances [Å] and angles [°] in the Cu<sup>I</sup> and Cu<sup>II</sup> complexes with the Me<sub>6</sub>TREN ligand (L) <sup>a</sup>; level of theory: M06/6-311+G(d,p).

|                     | Cu <sup>I</sup> L | Cu <sup>II</sup> LCu | Cu <sup>II</sup> LBr |
|---------------------|-------------------|----------------------|----------------------|
| N-C                 | 1.47              | 1.49                 | 1.48                 |
| N-C(Me)             | 1.47              | 1.47                 | 1.47                 |
| C-C                 | 1.53              | 1.52                 | 1.51                 |
| N( <i>ap</i> )-Cu   | 2.25              | 2.10                 | 2.11                 |
| N( <i>eq</i> )-Cu   | 2.12              | 2.17                 | 2.17                 |
| N'( <i>eq</i> )-Cu  | 2.11              | 2.24                 | 2.25                 |
| N''( <i>eq</i> )-Cu | 2.16              | 2.16                 | 2.17                 |
| Cu-X                | /                 | 2.20                 | 2.35                 |
| C-N-C               | 115               | 112                  | 112                  |
| N( <i>ap</i> )-Cu-N | 85                | 84                   | 84                   |
| N-Cu-N'             | 115               | 108                  | 108                  |
| N'-Cu-N''           | 124               | 131                  | 131                  |
| N''-Cu-N            | 119               | 118                  | 118                  |
| N( <i>ap</i> )-Cu-X | /                 | 179                  | 179                  |

<sup>a</sup> *eq* = equatorial, *ap* = apical, C(Me) = methyl carbon, X = Cl or Br.

**Table S3.** Interatomic distances [Å] and angles [°] in the Cu<sup>I</sup> and Cu<sup>II</sup> complexes with the PMDETA ligand (L) <sup>a</sup>; level of theory: M06/6-311+G(d,p).

|               | Cu <sup>I</sup> L | Cu <sup>II</sup> LCl | Cu <sup>II</sup> LBr |
|---------------|-------------------|----------------------|----------------------|
| N-C           | 1.46              | 1.48                 | 1.48                 |
| N-C(Me)       | 1.46              | 1.47                 | 1.47                 |
| C-C           | 1.52              | 1.51                 | 1.51                 |
| N(c)-Cu       | 2.29              | 2.04                 | 2.06                 |
| N(l)-Cu       | 1.98              | 2.09                 | 2.10                 |
| N(l)-Cu       | 1.98              | 2.09                 | 2.10                 |
| Cu-X          | /                 | 2.17                 | 2.31                 |
| C-N(c)-C      | 112               | 111                  | 111                  |
| N(c)-Cu-N(l)  | 88                | 85                   | 85                   |
| N(l)-Cu-N'(l) | 163               | 159                  | 157                  |
| N(c)-Cu-X     | /                 | 173                  | 170                  |
| N(l)-Cu-X     | /                 | 96                   | 97                   |

<sup>a</sup> c = central, l = lateral, X = Cl or Br

**Table S4.** Interatomic distances [Å] and angles [°] in the Cu<sup>I</sup> and Cu<sup>II</sup> complexes with the TPMA ligand (L) <sup>a</sup>; level of theory: M06/6-311+G(d,p).

|                    | Cu <sup>I</sup> L | Cu <sup>II</sup> LCl | Cu <sup>II</sup> LBr |
|--------------------|-------------------|----------------------|----------------------|
| N-C                | 1.45              | 1.47                 | 1.47                 |
| C(pyr)-N(eq)       | 1.34              | 1.34                 | 1.34                 |
| C-C <sub>pyr</sub> | 1.51              | 1.50                 | 1.38                 |
| N(ap)-Cu           | 2.26              | 2.11                 | 2.12                 |
| N(eq)-Cu           | 2.05              | 2.09                 | 2.10                 |
| N'(eq)-Cu          | 2.05              | 2.09                 | 2.10                 |
| N''(eq)-Cu         | 2.05              | 2.09                 | 2.10                 |
| Cu-X               | /                 | 2.20                 | 2.34                 |
| C-N-C              | 115               | 112                  | 112                  |
| C-C(pyr)-N(eq)     | 118               | 115                  | 116                  |
| C-C(pyr)-C(pyr)    | 121               | 123                  | 122                  |
| N(ap)-Cu-N(eq)     | 81                | 80                   | 80                   |
| N(eq)-Cu-N(eq)     | 118               | 117                  | 117                  |
| N(ap)-Cu-X         | /                 | 180                  | 180                  |
| N(eq)-Cu-X         | /                 | 100                  | 100                  |

<sup>a</sup> eq = equatorial, ap = apical, pyr = pyridine, X = Cl or Br.

**Table S5.**  $\Delta E_r$  and  $\Delta G_r$  [kcal/mol] for the R-X (X=Cl or Br) homolytic cleavage in gas phase and in solvent; level of theory (PCM-)M06/6-311+G(d,p).

| <i>Species</i>                                                   | Gas-phase    |                         | MeCN                    | DMSO                    |
|------------------------------------------------------------------|--------------|-------------------------|-------------------------|-------------------------|
|                                                                  | $\Delta E_r$ | $\Delta G_r$<br>(298 K) | $\Delta G_r$<br>(298 K) | $\Delta G_r$<br>(298 K) |
| AlCl $\rightarrow$ Al $\cdot$ + Cl $\cdot$                       | 69.4         | 57.9                    | 61.9                    | 61.8                    |
| AlBr $\rightarrow$ Al $\cdot$ + Br $\cdot$                       | 55.3         | 44.2                    | 48.0                    | 47.9                    |
| EtCl $\cdot$ Bu $\rightarrow$ Et $\cdot$ Bu $\cdot$ + Cl $\cdot$ | 72.9         | 59.2                    | 62.3                    | 62.2                    |
| EtBr $\cdot$ Bu $\rightarrow$ Et $\cdot$ Bu $\cdot$ + Br $\cdot$ | 58.2         | 44.7                    | 47.6                    | 47.3                    |
| MeClPr $\rightarrow$ MePr $\cdot$ + Cl $\cdot$                   | 74.3         | 62.1                    | 65.4                    | 65.3                    |
| MeBrPr $\rightarrow$ MePr $\cdot$ + Br $\cdot$                   | 60.4         | 48.5                    | 51.6                    | 51.5                    |

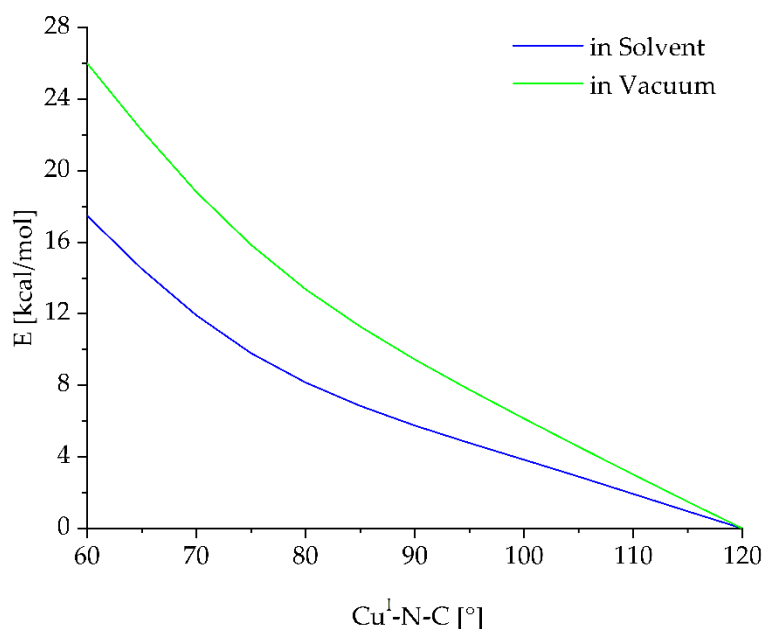

**Figure S1.** Energy profile of the Cu<sup>I</sup>-N-C angle in gas phase (green) and in acetonitrile (blue); level of theory: (PCM-)M06/6-311+G(d,p).

**Table S6.** Cu-Br and Cu-solvent interatomic distances [Å] in the [Cu<sup>II</sup>(PMDETA)Br(MeCN)]<sup>+</sup> complexes calculated in gas phase and in solvent (in parenthesis); level of theory: (PCM-)M06/6-311+G(d,p).

|              | I1          | I2          | I3          | I4          |
|--------------|-------------|-------------|-------------|-------------|
| <b>Cu-Br</b> | 2.35 (2.39) | 2.39 (2.44) | 2.42 (2.57) | 2.43 (2.66) |
| <b>Cu-N</b>  | 2.64 (2.57) | 2.34 (2.26) | 2.32 (2.04) | 2.22 (2.02) |

**Table S7.** Cu-Br and Cu-solvent interatomic distances [ $\text{\AA}$ ] in the  $[\text{Cu}^{\text{II}}(\text{PMDETA})\text{Br}(\text{DMSO-}\kappa\text{O}\alpha)]^+$  complexes calculated in gas phase and in solvent (in parenthesis); level of theory: (PCM-)M06/6-311+G(d,p).

|              | <b>I1</b>   | <b>I2</b>   | <b>I3</b>   | <b>I4</b>   |
|--------------|-------------|-------------|-------------|-------------|
| <b>Cu-Br</b> | 2.35 (2.40) | 2.39 (2.44) | 2.46 (2.59) | 2.50 (2.68) |
| <b>Cu-O</b>  | 2.38 (2.31) | 2.22 (2.20) | 2.01 (2.02) | 2.08 (2.00) |

# Cartesian coordinates

## Coordinates of the copper(I) complexes [Cu<sup>I</sup>L]<sup>+</sup>

[Cu<sup>I</sup>(Me<sub>6</sub>TREN)]<sup>+</sup>  
E=-2334.245535 a.u.

M06/6-311+G(d,p)

|    |              |              |              |
|----|--------------|--------------|--------------|
| Cu | -1.289540000 | 0.935189000  | -1.307415000 |
| N  | -3.045669000 | -0.255904000 | -1.232394000 |
| N  | -0.663078000 | -0.244943000 | 0.504358000  |
| N  | 0.542531000  | 0.311121000  | -2.152910000 |
| N  | -1.283016000 | 2.615593000  | 0.052529000  |
| C  | -3.133586000 | -0.590416000 | 0.201163000  |
| C  | -1.820395000 | -1.094089000 | 0.800353000  |
| H  | -3.913300000 | -1.355112000 | 0.365419000  |
| H  | -3.470966000 | 0.310327000  | 0.723995000  |
| H  | -1.615446000 | -2.102786000 | 0.426989000  |
| H  | -1.965499000 | -1.203294000 | 1.886672000  |
| C  | 0.535071000  | -0.941368000 | 0.026286000  |
| C  | 1.327456000  | -0.111594000 | -0.974412000 |
| H  | 0.221562000  | -1.880419000 | -0.441049000 |
| H  | 1.208690000  | -1.221976000 | 0.852403000  |
| H  | 2.216459000  | -0.680911000 | -1.295220000 |
| H  | 1.703703000  | 0.796143000  | -0.488138000 |
| C  | -1.288418000 | 1.999137000  | 1.394103000  |
| C  | -0.380058000 | 0.783990000  | 1.506345000  |
| H  | -2.318994000 | 1.712211000  | 1.626490000  |
| H  | -0.997232000 | 2.742844000  | 2.155198000  |
| H  | -0.465208000 | 0.378030000  | 2.528094000  |
| H  | 0.664008000  | 1.095542000  | 1.392776000  |
| C  | 0.370447000  | -0.813933000 | -3.081103000 |
| C  | 1.257721000  | 1.378681000  | -2.864955000 |
| C  | -2.451473000 | 3.491529000  | -0.092316000 |
| C  | -0.079218000 | 3.436521000  | -0.122506000 |
| C  | -2.953311000 | -1.480901000 | -2.034514000 |
| C  | -4.252150000 | 0.470031000  | -1.647540000 |
| H  | 0.824675000  | 2.837197000  | 0.009646000  |
| H  | -0.055251000 | 4.262225000  | 0.606689000  |
| H  | -0.068923000 | 3.862818000  | -1.129341000 |
| H  | 1.399830000  | 2.241364000  | -2.210719000 |
| H  | 0.674783000  | 1.691901000  | -3.734645000 |
| H  | 2.244372000  | 1.032841000  | -3.211609000 |
| H  | -0.124631000 | -1.652980000 | -2.589516000 |
| H  | 1.344103000  | -1.158360000 | -3.464357000 |
| H  | -0.246690000 | -0.499728000 | -3.926776000 |
| H  | -2.085924000 | -2.075092000 | -1.739220000 |
| H  | -2.850505000 | -1.222772000 | -3.091509000 |
| H  | -3.855624000 | -2.100675000 | -1.909383000 |
| H  | -4.351527000 | 1.395941000  | -1.076614000 |
| H  | -5.157338000 | -0.138270000 | -1.492335000 |

|   |              |             |              |
|---|--------------|-------------|--------------|
| H | -4.180450000 | 0.722676000 | -2.708313000 |
| H | -3.371657000 | 2.921512000 | 0.057852000  |
| H | -2.466881000 | 3.922654000 | -1.096768000 |
| H | -2.429593000 | 4.312784000 | 0.641729000  |

[Cu<sup>I</sup>(PMDETA)]<sup>+</sup>  
E=-2161.036555 a.u.

M06/6-311+G(d,p)

|    |              |              |              |
|----|--------------|--------------|--------------|
| Cu | -1.094251000 | -0.265965000 | -1.926153000 |
| N  | -2.965166000 | -0.757843000 | -1.486777000 |
| N  | -0.508329000 | -0.950548000 | 0.180958000  |
| N  | 0.827588000  | -0.353550000 | -2.410073000 |
| C  | -2.944997000 | -1.132580000 | -0.046865000 |
| C  | -1.659663000 | -1.835849000 | 0.365185000  |
| H  | -3.819842000 | -1.759721000 | 0.181209000  |
| H  | -3.056560000 | -0.209181000 | 0.531923000  |
| H  | -1.512884000 | -2.739033000 | -0.238653000 |
| H  | -1.756392000 | -2.172670000 | 1.409675000  |
| C  | 0.751177000  | -1.578860000 | -0.221701000 |
| C  | 1.539511000  | -0.654546000 | -1.138559000 |
| H  | 0.529016000  | -2.521374000 | -0.735723000 |
| H  | 1.377205000  | -1.838636000 | 0.646844000  |
| H  | 2.527538000  | -1.083109000 | -1.363975000 |
| H  | 1.715685000  | 0.299526000  | -0.629818000 |
| C  | 1.022628000  | -1.454464000 | -3.374439000 |
| C  | 1.361533000  | 0.889640000  | -2.996000000 |
| C  | -3.353803000 | -1.920973000 | -2.309056000 |
| C  | -3.942676000 | 0.324232000  | -1.704757000 |
| H  | 1.182869000  | 1.727380000  | -2.317876000 |
| H  | 0.860929000  | 1.091487000  | -3.945408000 |
| H  | 2.442342000  | 0.799187000  | -3.177519000 |
| H  | 0.650158000  | -2.396483000 | -2.963831000 |
| H  | 2.089645000  | -1.569947000 | -3.614860000 |
| H  | 0.473829000  | -1.238000000 | -4.293615000 |
| H  | -2.656164000 | -2.748923000 | -2.158954000 |
| H  | -3.338513000 | -1.644378000 | -3.365552000 |
| H  | -4.366385000 | -2.258133000 | -2.043228000 |
| C  | -0.332780000 | -0.035613000 | 1.302722000  |
| H  | -1.254392000 | 0.519088000  | 1.495624000  |
| H  | 0.444509000  | 0.700184000  | 1.082052000  |
| H  | -0.051597000 | -0.573030000 | 2.222462000  |
| H  | -3.646020000 | 1.212638000  | -1.142343000 |
| H  | -4.945428000 | 0.011680000  | -1.379061000 |
| H  | -3.980062000 | 0.575458000  | -2.766929000 |

[Cu<sup>I</sup>(TPMA)]<sup>+</sup>  
E=-2555.582519 a.u.

M06/6-311+G(d,p)

|   |              |             |              |
|---|--------------|-------------|--------------|
| N | -3.230368000 | 0.792771000 | -0.919074000 |
|---|--------------|-------------|--------------|

|   |              |              |              |
|---|--------------|--------------|--------------|
| C | -4.611339000 | 0.458561000  | -1.216818000 |
| C | -2.918701000 | 2.210603000  | -0.917167000 |
| C | -2.234995000 | -0.062932000 | -1.538879000 |
| C | -5.091392000 | -0.770364000 | -0.477106000 |
| H | -4.792911000 | 0.333698000  | -2.297633000 |
| H | -5.235053000 | 1.304695000  | -0.895480000 |
| N | -4.609338000 | -0.983250000 | 0.759239000  |
| C | -6.036580000 | -1.610534000 | -1.045354000 |
| C | -6.514932000 | -2.687357000 | -0.315093000 |
| C | -6.025294000 | -2.899064000 | 0.963486000  |
| C | -5.070900000 | -2.026800000 | 1.455886000  |
| H | -4.652181000 | -2.164585000 | 2.448812000  |
| H | -6.366982000 | -3.728755000 | 1.571175000  |
| H | -7.256402000 | -3.354809000 | -0.741595000 |
| H | -6.393579000 | -1.415605000 | -2.051995000 |
| C | -1.004249000 | -0.250706000 | -0.679871000 |
| H | -1.936192000 | 0.291712000  | -2.539733000 |
| H | -2.691680000 | -1.051865000 | -1.686151000 |
| C | 0.240805000  | -0.430311000 | -1.262604000 |
| C | 1.340272000  | -0.674581000 | -0.454530000 |
| C | 1.163900000  | -0.722553000 | 0.918697000  |
| C | -0.106459000 | -0.517582000 | 1.426944000  |
| N | -1.172172000 | -0.287422000 | 0.653144000  |
| H | 2.322498000  | -0.819794000 | -0.891932000 |
| H | 0.341391000  | -0.380848000 | -2.342508000 |
| H | -0.285546000 | -0.534965000 | 2.498323000  |
| H | 1.993729000  | -0.907384000 | 1.590740000  |
| C | -3.441902000 | 2.925758000  | 0.308634000  |
| H | -3.276753000 | 2.723872000  | -1.825511000 |
| H | -1.824041000 | 2.310332000  | -0.918071000 |
| C | -3.842997000 | 4.250763000  | 0.234106000  |
| N | -3.452788000 | 2.248616000  | 1.469554000  |
| C | -3.849133000 | 2.883147000  | 2.577539000  |
| C | -4.247142000 | 4.904125000  | 1.387956000  |
| C | -4.247590000 | 4.208016000  | 2.585743000  |
| H | -4.557875000 | 4.675473000  | 3.512901000  |
| H | -3.846475000 | 2.298367000  | 3.493101000  |

### Coordinates of the solvent molecules

MeCN

E=-132.693513 a.u.

|                  |              |             |              |
|------------------|--------------|-------------|--------------|
| M06/6-311+G(d,p) |              |             |              |
| C                | -4.988655000 | 2.677322000 | -0.000010000 |
| C                | -3.552273000 | 2.852612000 | -0.000016000 |
| H                | -5.280580000 | 1.934497000 | 0.745734000  |
| H                | -5.329952000 | 2.338662000 | -0.980802000 |
| H                | -5.486418000 | 3.620784000 | 0.235070000  |
| N                | -2.409422000 | 2.992243000 | 0.000024000  |

DMSO

E=-553.121914 a.u.

|                  |              |              |              |
|------------------|--------------|--------------|--------------|
| M06/6-311+G(d,p) |              |              |              |
| S                | -0.797028000 | 0.647002000  | -2.128459000 |
| O                | 0.230134000  | -0.386497000 | -1.776294000 |
| C                | -2.153895000 | -0.247787000 | -2.949009000 |
| H                | -1.772066000 | -0.600906000 | -3.907929000 |
| H                | -2.428496000 | -1.101717000 | -2.323814000 |
| H                | -3.004031000 | 0.420784000  | -3.106934000 |
| C                | -1.721695000 | 0.983254000  | -0.596247000 |
| H                | -2.581991000 | 1.623107000  | -0.808564000 |
| H                | -2.031806000 | 0.026834000  | -0.166673000 |
| H                | -1.037891000 | 1.489421000  | 0.086565000  |

### Coordinates of the copper(I) complexes with coordinated solvent molecules [Cu<sup>I</sup>LS]<sup>+</sup>

[Cu<sup>I</sup>(Me<sub>6</sub>TREN)(MeCN)]<sup>+</sup>

E=-2466.967585 a.u.

|                  |              |              |              |
|------------------|--------------|--------------|--------------|
| M06/6-311+G(d,p) |              |              |              |
| Cu               | -0.340183000 | -0.010905000 | -0.018102000 |
| N                | 0.173980000  | -1.630670000 | -1.456085000 |
| N                | 2.110888000  | 0.115742000  | -0.100705000 |
| N                | 0.012435000  | 2.159422000  | -0.521553000 |
| N                | 0.224069000  | -0.604591000 | 2.066178000  |
| C                | 1.503137000  | -2.114473000 | -1.076590000 |
| C                | 2.540782000  | -1.006408000 | -0.932550000 |
| H                | 1.874521000  | -2.846959000 | -1.817225000 |
| H                | 1.392757000  | -2.660420000 | -0.133531000 |
| H                | 2.797954000  | -0.626266000 | -1.926896000 |
| H                | 3.467053000  | -1.459508000 | -0.542343000 |
| C                | 2.396872000  | 1.433591000  | -0.663451000 |
| C                | 1.405636000  | 2.489749000  | -0.206778000 |
| H                | 2.366649000  | 1.354675000  | -1.755260000 |
| H                | 3.414479000  | 1.779858000  | -0.411656000 |
| H                | 1.684632000  | 3.461350000  | -0.652817000 |
| H                | 1.477073000  | 2.623855000  | 0.879427000  |
| C                | 1.651448000  | -0.944937000 | 2.105839000  |
| C                | 2.516046000  | 0.005884000  | 1.297480000  |
| H                | 1.766177000  | -1.964909000 | 1.724331000  |
| H                | 2.014019000  | -0.965688000 | 3.148969000  |
| H                | 3.567488000  | -0.321133000 | 1.381321000  |
| H                | 2.476309000  | 1.002592000  | 1.749517000  |
| C                | -0.264718000 | 2.360282000  | -1.942816000 |
| C                | -0.885072000 | 3.015645000  | 0.250981000  |
| C                | -0.572089000 | -1.748286000 | 2.506746000  |
| C                | -0.063977000 | 0.527751000  | 2.945723000  |
| C                | 0.161496000  | -1.151086000 | -2.836140000 |
| C                | -0.799418000 | -2.713376000 | -1.330692000 |

|   |              |              |              |
|---|--------------|--------------|--------------|
| H | 0.530794000  | 1.400316000  | 2.664044000  |
| H | 0.155642000  | 0.284390000  | 3.999085000  |
| H | -1.121803000 | 0.795626000  | 2.862476000  |
| H | -0.732485000 | 2.856227000  | 1.321936000  |
| H | -1.923228000 | 2.770758000  | 0.010779000  |
| H | -0.719258000 | 4.082824000  | 0.026912000  |
| H | 0.408624000  | 1.762245000  | -2.560176000 |
| H | -0.149641000 | 3.419701000  | -2.228418000 |
| H | -1.290206000 | 2.048566000  | -2.162924000 |
| H | 0.891263000  | -0.350479000 | -2.977095000 |
| H | -0.829591000 | -0.753471000 | -3.075483000 |
| H | 0.396933000  | -1.962209000 | -3.545991000 |
| H | -0.847326000 | -3.059845000 | -0.294266000 |
| H | -0.540641000 | -3.568562000 | -1.977207000 |
| H | -1.790056000 | -2.349977000 | -1.617053000 |
| H | -0.384965000 | -2.609758000 | 1.859197000  |
| H | -1.635779000 | -1.499428000 | 2.452716000  |
| H | -0.332249000 | -2.035021000 | 3.544413000  |
| N | -2.378459000 | -0.027493000 | -0.016534000 |
| C | -3.529558000 | -0.060561000 | -0.004326000 |
| C | -4.972397000 | -0.101187000 | 0.009748000  |
| H | -5.363971000 | 0.631530000  | 0.719154000  |
| H | -5.366096000 | 0.127323000  | -0.983389000 |
| H | -5.319308000 | -1.094346000 | 0.304254000  |

[Cu<sup>I</sup>(PMDETA)(MeCN)]<sup>+</sup>  
E=-2293.766687 a.u.

|                  |              |              |              |
|------------------|--------------|--------------|--------------|
| M06/6-311+G(d,p) |              |              |              |
| Cu               | -1.211030000 | -0.133176000 | -2.348699000 |
| N                | -2.936809000 | -1.260857000 | -1.812999000 |
| N                | -0.657747000 | -0.388216000 | -0.192114000 |
| N                | 0.753541000  | -0.870773000 | -2.713756000 |
| C                | -3.032811000 | -1.030258000 | -0.360219000 |
| C                | -1.711945000 | -1.251493000 | 0.353658000  |
| H                | -3.810408000 | -1.677144000 | 0.081169000  |
| H                | -3.361386000 | 0.006514000  | -0.215340000 |
| H                | -1.402297000 | -2.296113000 | 0.245886000  |
| H                | -1.852855000 | -1.082872000 | 1.432902000  |
| C                | 0.675968000  | -0.999989000 | -0.229389000 |
| C                | 1.453645000  | -0.556987000 | -1.455027000 |
| H                | 0.563463000  | -2.089043000 | -0.235011000 |
| H                | 1.257063000  | -0.756017000 | 0.673873000  |
| H                | 2.457143000  | -1.016199000 | -1.448470000 |
| H                | 1.600839000  | 0.529884000  | -1.425606000 |
| C                | 0.802596000  | -2.306291000 | -3.003892000 |
| C                | 1.383784000  | -0.144255000 | -3.820412000 |
| C                | -2.828014000 | -2.690270000 | -2.116691000 |
| C                | -4.131665000 | -0.727811000 | -2.474742000 |
| H                | 1.339757000  | 0.931417000  | -3.630758000 |
| H                | 0.849579000  | -0.355849000 | -4.750467000 |
| H                | 2.437623000  | -0.440518000 | -3.945322000 |
| H                | 0.325812000  | -2.882369000 | -2.207470000 |

|   |              |              |              |
|---|--------------|--------------|--------------|
| H | 1.841961000  | -2.655299000 | -3.115242000 |
| H | 0.265945000  | -2.507817000 | -3.934828000 |
| H | -1.937596000 | -3.121498000 | -1.653358000 |
| H | -2.746419000 | -2.827178000 | -3.198283000 |
| H | -3.712002000 | -3.242411000 | -1.758645000 |
| C | -0.634700000 | 0.916231000  | 0.465311000  |
| H | -1.615339000 | 1.394723000  | 0.390297000  |
| H | 0.087676000  | 1.574463000  | -0.025730000 |
| H | -0.365389000 | 0.829957000  | 1.530530000  |
| H | -4.219212000 | 0.343527000  | -2.275875000 |
| H | -5.044768000 | -1.231392000 | -2.118935000 |
| H | -4.050365000 | -0.875816000 | -3.554849000 |
| N | -1.583467000 | 1.627309000  | -3.110529000 |
| C | -1.811303000 | 2.642310000  | -3.602356000 |
| C | -2.097900000 | 3.913966000  | -4.218826000 |
| H | -1.201995000 | 4.309316000  | -4.703150000 |
| H | -2.882068000 | 3.798820000  | -4.970799000 |
| H | -2.435433000 | 4.629849000  | -3.465716000 |

[Cu<sup>I</sup>(PMDETA)(MeCN)<sub>2</sub>]<sup>+</sup>  
E=-2426478348 a.u.

|                  |              |              |              |
|------------------|--------------|--------------|--------------|
| M06/6-311+G(d,p) |              |              |              |
| Cu               | -1.150993000 | 0.401587000  | -1.698410000 |
| N                | -2.982258000 | -0.721923000 | -1.539211000 |
| N                | -0.547661000 | -1.089891000 | 0.071598000  |
| N                | 0.770846000  | -0.253184000 | -2.420467000 |
| C                | -2.985647000 | -1.300217000 | -0.187518000 |
| C                | -1.684811000 | -2.000753000 | 0.159553000  |
| H                | -3.829159000 | -2.003615000 | -0.071956000 |
| H                | -3.159869000 | -0.478094000 | 0.518171000  |
| H                | -1.520190000 | -2.837772000 | -0.527367000 |
| H                | -1.776917000 | -2.443863000 | 1.165627000  |
| C                | 0.699646000  | -1.692452000 | -0.389104000 |
| C                | 1.503850000  | -0.723550000 | -1.236030000 |
| H                | 0.465336000  | -2.588973000 | -0.972698000 |
| H                | 1.325086000  | -2.031806000 | 0.453749000  |
| H                | 2.457147000  | -1.194016000 | -1.535401000 |
| H                | 1.760194000  | 0.160995000  | -0.639050000 |
| C                | 0.647848000  | -1.311971000 | -3.423195000 |
| C                | 1.480665000  | 0.880603000  | -3.013881000 |
| C                | -3.070981000 | -1.764098000 | -2.562749000 |
| C                | -4.122675000 | 0.183623000  | -1.684665000 |
| H                | 1.559278000  | 1.691295000  | -2.283933000 |
| H                | 0.924386000  | 1.246654000  | -3.880311000 |
| H                | 2.495008000  | 0.594970000  | -3.338671000 |
| H                | 0.111438000  | -2.172743000 | -3.016326000 |
| H                | 1.638170000  | -1.648639000 | -3.772718000 |
| H                | 0.079153000  | -0.936184000 | -4.277255000 |
| H                | -2.232476000 | -2.459996000 | -2.481569000 |
| H                | -3.028745000 | -1.302905000 | -3.552736000 |
| H                | -4.010326000 | -2.334682000 | -2.471999000 |
| C                | -0.361792000 | -0.333532000 | 1.300384000  |



|   |              |              |              |
|---|--------------|--------------|--------------|
| H | -1.279681000 | 0.200618000  | 1.562798000  |
| H | 0.424076000  | 0.416440000  | 1.171033000  |
| H | -0.084586000 | -0.987166000 | 2.145273000  |
| H | -4.055926000 | 0.984883000  | -0.943158000 |
| H | -5.078868000 | -0.348440000 | -1.548326000 |
| H | -4.108768000 | 0.631491000  | -2.681348000 |
| C | -2.096848000 | 1.649779000  | -4.994883000 |
| C | -2.475087000 | 2.385976000  | -6.179454000 |
| H | -1.630065000 | 2.973029000  | -6.545934000 |
| H | -2.790052000 | 1.697737000  | -6.966971000 |
| H | -3.301887000 | 3.063821000  | -5.956118000 |
| N | -1.795908000 | 1.059279000  | -4.052522000 |
| N | -1.200422000 | 2.237091000  | -0.970755000 |
| C | -1.218068000 | 3.297204000  | -0.523085000 |
| C | -1.240369000 | 4.626980000  | 0.037045000  |
| H | -2.253481000 | 5.034467000  | 0.004463000  |
| H | -0.906131000 | 4.603691000  | 1.076881000  |
| H | -0.578092000 | 5.286668000  | -0.528386000 |

[Cu<sup>I</sup>(TPMA)(MeCN)]<sup>+</sup>  
E=-2688.302828 a.u.

| M06/6-311+G(d,p) |              |              |              |
|------------------|--------------|--------------|--------------|
| N                | -3.222085000 | 0.759789000  | -0.787410000 |
| C                | -4.607917000 | 0.479007000  | -1.079987000 |
| C                | -2.863781000 | 2.158388000  | -0.806580000 |
| C                | -2.272126000 | -0.123816000 | -1.421204000 |
| C                | -5.097270000 | -0.771843000 | -0.392436000 |
| H                | -4.810060000 | 0.407283000  | -2.164196000 |
| H                | -5.209516000 | 1.321941000  | -0.711371000 |
| N                | -4.605778000 | -1.038974000 | 0.823794000  |
| C                | -6.049155000 | -1.583705000 | -0.994377000 |
| C                | -6.519408000 | -2.695062000 | -0.313963000 |
| C                | -6.015274000 | -2.968359000 | 0.947826000  |
| C                | -5.059611000 | -2.114877000 | 1.470626000  |
| H                | -4.629518000 | -2.295807000 | 2.453178000  |
| H                | -6.347757000 | -3.829250000 | 1.516364000  |
| H                | -7.263849000 | -3.342710000 | -0.765563000 |
| H                | -6.413615000 | -1.340153000 | -1.987883000 |
| C                | -1.011476000 | -0.288991000 | -0.608728000 |
| H                | -2.011000000 | 0.193810000  | -2.447100000 |
| H                | -2.741435000 | -1.113209000 | -1.516996000 |
| C                | 0.214160000  | -0.471654000 | -1.234875000 |
| C                | 1.345430000  | -0.677643000 | -0.462216000 |
| C                | 1.219164000  | -0.684790000 | 0.917984000  |
| C                | -0.037130000 | -0.482707000 | 1.462182000  |
| N                | -1.132686000 | -0.289472000 | 0.724473000  |
| H                | 2.313226000  | -0.823449000 | -0.930923000 |
| H                | 0.272959000  | -0.451522000 | -2.318996000 |
| H                | -0.181511000 | -0.470860000 | 2.540216000  |
| H                | 2.075979000  | -0.836104000 | 1.564426000  |
| C                | -3.411856000 | 2.908044000  | 0.382754000  |
| H                | -3.173725000 | 2.666584000  | -1.737798000 |

|    |              |              |              |
|----|--------------|--------------|--------------|
| H  | -1.767356000 | 2.227690000  | -0.770335000 |
| C  | -3.793246000 | 4.237930000  | 0.265669000  |
| N  | -3.476557000 | 2.252853000  | 1.548457000  |
| C  | -3.912998000 | 2.911353000  | 2.624429000  |
| C  | -4.239171000 | 4.915944000  | 1.388367000  |
| C  | -4.300468000 | 4.239524000  | 2.596571000  |
| H  | -4.648235000 | 4.725587000  | 3.500833000  |
| H  | -3.953394000 | 2.338856000  | 3.548435000  |
| H  | -4.541421000 | 5.955871000  | 1.319540000  |
| H  | -3.738084000 | 4.730638000  | -0.700455000 |
| Cu | -3.023329000 | 0.160756000  | 1.627037000  |
| N  | -2.863183000 | -0.327838000 | 3.588806000  |
| C  | -2.774838000 | -0.606941000 | 4.702151000  |
| C  | -2.663894000 | -0.957037000 | 6.098171000  |
| H  | -3.653428000 | -0.983652000 | 6.560313000  |
| H  | -2.200391000 | -1.940516000 | 6.204889000  |
| H  | -2.050883000 | -0.221463000 | 6.624115000  |

[Cu<sup>I</sup>(Me<sub>6</sub>TREN)(DMSO-κOα)]<sup>+</sup>  
E=-2887.400606 a.u.

| M06/6-311+G(d,p) |              |              |              |
|------------------|--------------|--------------|--------------|
| Cu               | 0.134551000  | 0.034263000  | 0.002236000  |
| N                | 0.350602000  | -1.421443000 | -1.617279000 |
| N                | 2.508246000  | 0.016243000  | -0.198735000 |
| N                | 0.484346000  | 2.186792000  | -0.256227000 |
| N                | 0.676949000  | -0.819847000 | 1.974563000  |
| C                | 1.660901000  | -2.036597000 | -1.370268000 |
| C                | 2.793157000  | -1.031151000 | -1.175293000 |
| H                | 1.930951000  | -2.709789000 | -2.205086000 |
| H                | 1.559291000  | -2.670554000 | -0.483432000 |
| H                | 3.024770000  | -0.560498000 | -2.136906000 |
| H                | 3.698063000  | -1.597540000 | -0.899499000 |
| C                | 2.822615000  | 1.375136000  | -0.634613000 |
| C                | 1.912149000  | 2.420183000  | -0.008091000 |
| H                | 2.725827000  | 1.415124000  | -1.724861000 |
| H                | 3.867791000  | 1.651812000  | -0.411498000 |
| H                | 2.211731000  | 3.420104000  | -0.370078000 |
| H                | 2.058792000  | 2.434495000  | 1.078411000  |
| C                | 2.077950000  | -1.250857000 | 1.908061000  |
| C                | 2.970996000  | -0.276437000 | 1.154621000  |
| H                | 2.107528000  | -2.230984000 | 1.419981000  |
| H                | 2.487137000  | -1.402622000 | 2.922883000  |
| H                | 3.997853000  | -0.682536000 | 1.144266000  |
| H                | 3.026630000  | 0.665345000  | 1.710998000  |
| C                | 0.118872000  | 2.567895000  | -1.618855000 |
| C                | -0.321572000 | 2.975320000  | 0.675522000  |
| C                | -0.190304000 | -1.946048000 | 2.311273000  |
| C                | 0.496941000  | 0.218282000  | 2.989072000  |
| C                | 0.303706000  | -0.815108000 | -2.947298000 |
| C                | -0.690980000 | -2.443729000 | -1.536828000 |
| H                | 1.156594000  | 1.067972000  | 2.795583000  |
| H                | 0.719588000  | -0.166839000 | 3.998915000  |

|   |              |              |              |
|---|--------------|--------------|--------------|
| H | -0.537547000 | 0.571826000  | 2.964394000  |
| H | -0.065813000 | 2.717005000  | 1.705648000  |
| H | -1.379435000 | 2.744543000  | 0.526193000  |
| H | -0.160743000 | 4.056944000  | 0.531642000  |
| H | 0.715707000  | 2.021300000  | -2.352065000 |
| H | 0.263565000  | 3.648903000  | -1.787094000 |
| H | -0.934952000 | 2.326359000  | -1.793735000 |
| H | 1.081003000  | -0.055365000 | -3.055152000 |
| H | -0.666848000 | -0.332432000 | -3.096524000 |
| H | 0.446886000  | -1.571272000 | -3.737940000 |
| H | -0.724267000 | -2.870469000 | -0.530067000 |
| H | -0.519478000 | -3.257846000 | -2.261275000 |
| H | -1.663524000 | -1.992510000 | -1.758838000 |
| H | -0.062707000 | -2.751596000 | 1.581709000  |
| H | -1.232756000 | -1.614477000 | 2.289377000  |
| H | 0.036421000  | -2.350074000 | 3.312565000  |
| O | -1.998910000 | 0.220254000  | 0.495330000  |
| S | -3.217598000 | -0.053914000 | -0.380096000 |
| C | -4.138665000 | -1.333892000 | 0.503994000  |
| H | -5.108194000 | -1.491657000 | 0.025400000  |
| H | -3.545971000 | -2.249670000 | 0.453153000  |
| H | -4.255427000 | -1.016243000 | 1.543576000  |
| C | -4.344883000 | 1.317806000  | -0.039717000 |
| H | -3.910231000 | 2.214502000  | -0.485317000 |
| H | -5.319104000 | 1.115432000  | -0.491309000 |
| H | -4.424552000 | 1.433233000  | 1.044305000  |

[Cu<sup>I</sup>(PMDETA)(DMSO-κOα)]<sup>+</sup>  
E=-2714.196996 a.u.

|                  |              |              |              |
|------------------|--------------|--------------|--------------|
| M06/6-311+G(d,p) |              |              |              |
| Cu               | -1.163305000 | -0.269103000 | -2.553723000 |
| N                | -2.969094000 | -1.113830000 | -2.033604000 |
| N                | -0.720512000 | -0.250533000 | -0.316617000 |
| N                | 0.821697000  | -0.867554000 | -2.773567000 |
| C                | -3.103081000 | -0.813226000 | -0.591645000 |
| C                | -1.824237000 | -1.063243000 | 0.191864000  |
| H                | -3.930329000 | -1.401529000 | -0.159740000 |
| H                | -3.384782000 | 0.243627000  | -0.505727000 |
| H                | -1.545046000 | -2.119950000 | 0.122250000  |
| H                | -2.020998000 | -0.867054000 | 1.258816000  |
| C                | 0.603794000  | -0.874714000 | -0.283979000 |
| C                | 1.435695000  | -0.471986000 | -1.490854000 |
| H                | 0.479476000  | -1.962720000 | -0.261427000 |
| H                | 1.154662000  | -0.609200000 | 0.633068000  |
| H                | 2.449065000  | -0.900603000 | -1.407251000 |
| H                | 1.550792000  | 0.618345000  | -1.509604000 |
| C                | 0.963149000  | -2.309417000 | -2.999454000 |
| C                | 1.474209000  | -0.146163000 | -3.873490000 |
| C                | -2.952666000 | -2.565065000 | -2.264240000 |
| C                | -4.107154000 | -0.539912000 | -2.760174000 |
| H                | 1.316119000  | 0.927456000  | -3.752962000 |
| H                | 1.030886000  | -0.455449000 | -4.823562000 |

|   |              |              |              |
|---|--------------|--------------|--------------|
| H | 2.554099000  | -0.362228000 | -3.902387000 |
| H | 0.486636000  | -2.878319000 | -2.197441000 |
| H | 2.024798000  | -2.600626000 | -3.053996000 |
| H | 0.477424000  | -2.579699000 | -3.940741000 |
| H | -2.118395000 | -3.030928000 | -1.735734000 |
| H | -2.828957000 | -2.762347000 | -3.332067000 |
| H | -3.891845000 | -3.029483000 | -1.922852000 |
| C | -0.710062000 | 1.087668000  | 0.255585000  |
| H | -1.679311000 | 1.573649000  | 0.106005000  |
| H | 0.042445000  | 1.706317000  | -0.241158000 |
| H | -0.494624000 | 1.068531000  | 1.336937000  |
| H | -4.125599000 | 0.546301000  | -2.626071000 |
| H | -5.062556000 | -0.953671000 | -2.399427000 |
| H | -4.012356000 | -0.766106000 | -3.825715000 |
| O | -0.974105000 | 1.749103000  | -3.106592000 |
| S | -2.148374000 | 2.732449000  | -3.124184000 |
| C | -2.664010000 | 2.803324000  | -4.853556000 |
| H | -1.782899000 | 2.995685000  | -5.470589000 |
| H | -3.091140000 | 1.829577000  | -5.101476000 |
| H | -3.417465000 | 3.584507000  | -4.979873000 |
| C | -1.362667000 | 4.353746000  | -3.040812000 |
| H | -0.935753000 | 4.457461000  | -2.042226000 |
| H | -0.574259000 | 4.390052000  | -3.796527000 |
| H | -2.112186000 | 5.130620000  | -3.209388000 |

[Cu<sup>I</sup>(PMDETA)(DMSO-κOα)<sub>2</sub>]<sup>+</sup>  
E=-3267.347917 a.u.

|                  |              |              |              |
|------------------|--------------|--------------|--------------|
| M06/6-311+G(d,p) |              |              |              |
| Cu               | 0.160899000  | -0.472838000 | 0.025330000  |
| N                | 0.435050000  | -0.885245000 | 2.058852000  |
| N                | 2.724598000  | -0.397075000 | 0.170207000  |
| N                | 0.664812000  | -1.197824000 | -1.872743000 |
| C                | 1.804933000  | -0.527830000 | 2.454837000  |
| C                | 2.859510000  | -1.021688000 | 1.480657000  |
| H                | 2.020476000  | -0.915698000 | 3.466350000  |
| H                | 1.853956000  | 0.567217000  | 2.517139000  |
| H                | 2.776929000  | -2.107763000 | 1.367542000  |
| H                | 3.856200000  | -0.837311000 | 1.917334000  |
| C                | 2.995107000  | -1.256950000 | -0.974657000 |
| C                | 2.085566000  | -0.938161000 | -2.148042000 |
| H                | 2.853568000  | -2.300828000 | -0.674743000 |
| H                | 4.044169000  | -1.174955000 | -1.308830000 |
| H                | 2.408946000  | -1.506020000 | -3.038280000 |
| H                | 2.182567000  | 0.125334000  | -2.403532000 |
| C                | 0.374712000  | -2.636033000 | -1.901553000 |
| C                | -0.160625000 | -0.529146000 | -2.880196000 |
| C                | 0.170951000  | -2.313044000 | 2.272706000  |
| C                | -0.524386000 | -0.111123000 | 2.846715000  |
| H                | -0.024604000 | 0.554336000  | -2.813148000 |
| H                | -1.214214000 | -0.750791000 | -2.694533000 |
| H                | 0.096289000  | -0.866040000 | -3.898281000 |
| H                | 1.002528000  | -3.169744000 | -1.184248000 |

|   |              |              |              |
|---|--------------|--------------|--------------|
| H | 0.551370000  | -3.056129000 | -2.905843000 |
| H | -0.667969000 | -2.795289000 | -1.616315000 |
| H | 0.876031000  | -2.924991000 | 1.705202000  |
| H | -0.836620000 | -2.544327000 | 1.919175000  |
| H | 0.255596000  | -2.575971000 | 3.340567000  |
| C | 3.446159000  | 0.858100000  | 0.093708000  |
| H | 3.120749000  | 1.538980000  | 0.886801000  |
| H | 3.256467000  | 1.353975000  | -0.864603000 |
| H | 4.538004000  | 0.717338000  | 0.186965000  |
| H | -0.393799000 | 0.957743000  | 2.648136000  |
| H | -0.396055000 | -0.292504000 | 3.926839000  |
| H | -1.537106000 | -0.398172000 | 2.554078000  |
| O | -0.574372000 | 1.603827000  | -0.171135000 |
| S | 0.364768000  | 2.778659000  | 0.094370000  |
| C | -0.741027000 | 4.149106000  | 0.500356000  |
| H | -1.515663000 | 4.205795000  | -0.268952000 |
| H | -1.186319000 | 3.926085000  | 1.472040000  |
| H | -0.170965000 | 5.079532000  | 0.558826000  |
| C | 0.856634000  | 3.361172000  | -1.545478000 |
| H | 1.484185000  | 2.582802000  | -1.985803000 |
| H | -0.044896000 | 3.503661000  | -2.147290000 |
| H | 1.425580000  | 4.289651000  | -1.453895000 |
| C | -3.606993000 | 0.834363000  | 0.706840000  |
| H | -4.491507000 | 1.388140000  | 0.382249000  |
| H | -2.738835000 | 1.492869000  | 0.769483000  |
| H | -3.789483000 | 0.329369000  | 1.659400000  |
| H | -4.637832000 | -1.795634000 | 0.745865000  |
| C | -4.632349000 | -1.460725000 | -0.294437000 |
| H | -5.539067000 | -0.900090000 | -0.535118000 |
| H | -4.534550000 | -2.316493000 | -0.963307000 |
| S | -3.184346000 | -0.404079000 | -0.541482000 |
| O | -2.022795000 | -1.197862000 | 0.044761000  |

[Cu<sup>I</sup>(TPMA)(DMSO-κOα)]<sup>+</sup>  
E=-3267.347917 a.u.

| M06/6-311+G(d,p) |              |              |              |
|------------------|--------------|--------------|--------------|
| N                | -1.970999000 | 0.424496000  | -0.864715000 |
| C                | -2.714314000 | 1.006257000  | 0.232260000  |
| C                | -1.586609000 | 1.333466000  | -1.918944000 |
| C                | -2.434752000 | -0.869400000 | -1.308676000 |
| C                | -2.434891000 | 0.309488000  | 1.544250000  |
| H                | -3.803126000 | 1.025448000  | 0.047979000  |
| H                | -2.401239000 | 2.054968000  | 0.333466000  |
| N                | -1.180439000 | -0.107788000 | 1.758759000  |
| C                | -3.432519000 | 0.142936000  | 2.493644000  |
| C                | -3.119699000 | -0.459737000 | 3.702762000  |
| C                | -1.820517000 | -0.889075000 | 3.922255000  |
| C                | -0.885058000 | -0.696193000 | 2.919259000  |
| H                | 0.146247000  | -1.025042000 | 3.027195000  |
| H                | -1.534344000 | -1.373018000 | 4.849072000  |
| H                | -3.884160000 | -0.599904000 | 4.460166000  |
| H                | -4.441927000 | 0.483319000  | 2.282585000  |

|    |              |              |              |
|----|--------------|--------------|--------------|
| C  | -1.316690000 | -1.784093000 | -1.754161000 |
| H  | -3.193018000 | -0.797741000 | -2.108789000 |
| H  | -2.934714000 | -1.357497000 | -0.460057000 |
| C  | -1.543797000 | -2.748673000 | -2.726564000 |
| C  | -0.532041000 | -3.640114000 | -3.044544000 |
| C  | 0.680353000  | -3.541133000 | -2.379193000 |
| C  | 0.831279000  | -2.540605000 | -1.435055000 |
| N  | -0.137106000 | -1.673281000 | -1.131852000 |
| H  | -0.688499000 | -4.403063000 | -3.800234000 |
| H  | -2.509390000 | -2.798781000 | -3.221086000 |
| H  | 1.755018000  | -2.420325000 | -0.873025000 |
| H  | 1.496713000  | -4.223119000 | -2.588274000 |
| C  | -0.526221000 | 2.315152000  | -1.481874000 |
| H  | -2.443910000 | 1.887630000  | -2.342495000 |
| H  | -1.170924000 | 0.733171000  | -2.741221000 |
| C  | -0.541097000 | 3.622170000  | -1.949173000 |
| N  | 0.433473000  | 1.869187000  | -0.655965000 |
| C  | 1.391787000  | 2.723333000  | -0.282147000 |
| C  | 0.464616000  | 4.495149000  | -1.567164000 |
| C  | 1.453925000  | 4.036682000  | -0.711958000 |
| H  | 2.254997000  | 4.683300000  | -0.372814000 |
| H  | 2.139576000  | 2.333985000  | 0.406611000  |
| H  | 0.469335000  | 5.520308000  | -1.922618000 |
| H  | -1.342017000 | 3.946402000  | -2.606710000 |
| Cu | 0.181965000  | -0.032572000 | 0.160017000  |
| O  | 1.962718000  | -0.868112000 | 1.159135000  |
| S  | 3.284742000  | -0.109159000 | 1.216623000  |
| C  | 4.030214000  | -0.335597000 | -0.417340000 |
| H  | 5.009177000  | 0.149355000  | -0.443963000 |
| H  | 4.118521000  | -1.405509000 | -0.623783000 |
| H  | 3.357524000  | 0.134706000  | -1.138888000 |
| C  | 4.405367000  | -1.195172000 | 2.127419000  |
| H  | 4.322988000  | -2.199498000 | 1.704335000  |
| H  | 5.425725000  | -0.812015000 | 2.048974000  |
| H  | 4.086323000  | -1.198402000 | 3.170094000  |

[Cu<sup>I</sup>(Me<sub>6</sub>TREN)(DMSO-κS)]<sup>+</sup>  
E=-2887.391744 a.u.

| M06/6-311+G(d,p) |              |              |              |
|------------------|--------------|--------------|--------------|
| Cu               | -0.012166000 | 0.000049000  | -0.069094000 |
| N                | 0.457547000  | -1.850407000 | -1.220727000 |
| N                | 2.379383000  | -0.018695000 | 0.029874000  |
| N                | 0.399454000  | 2.006299000  | -0.872705000 |
| N                | 0.280730000  | -0.197105000 | 2.128197000  |
| C                | 1.715997000  | -2.336241000 | -0.641012000 |
| C                | 2.808887000  | -1.276475000 | -0.578046000 |
| H                | 2.094523000  | -3.200324000 | -1.217025000 |
| H                | 1.486791000  | -2.708681000 | 0.363333000  |
| H                | 3.173529000  | -1.073111000 | -1.590537000 |
| H                | 3.666684000  | -1.707815000 | -0.037691000 |
| C                | 2.762893000  | 1.182506000  | -0.710244000 |
| C                | 1.787913000  | 2.326112000  | -0.498589000 |

|   |              |              |              |
|---|--------------|--------------|--------------|
| H | 2.809063000  | 0.930871000  | -1.775055000 |
| H | 3.772595000  | 1.533592000  | -0.436693000 |
| H | 2.137613000  | 3.208510000  | -1.062230000 |
| H | 1.783586000  | 2.622163000  | 0.556539000  |
| C | 1.665264000  | -0.648867000 | 2.330647000  |
| C | 2.671655000  | 0.079668000  | 1.459300000  |
| H | 1.703774000  | -1.724138000 | 2.123576000  |
| H | 1.951816000  | -0.529777000 | 3.390237000  |
| H | 3.678640000  | -0.311238000 | 1.683743000  |
| H | 2.693105000  | 1.138075000  | 1.738328000  |
| C | 0.258723000  | 2.010562000  | -2.331559000 |
| C | -0.484903000 | 3.040965000  | -0.320298000 |
| C | -0.631788000 | -1.167028000 | 2.738789000  |
| C | 0.058900000  | 1.099660000  | 2.784061000  |
| C | 0.608780000  | -1.593102000 | -2.652787000 |
| C | -0.577188000 | -2.866083000 | -1.042359000 |
| H | 0.753325000  | 1.850371000  | 2.399279000  |
| H | 0.212282000  | 1.018096000  | 3.872554000  |
| H | -0.963912000 | 1.431887000  | 2.586061000  |
| H | -0.426581000 | 3.047839000  | 0.769671000  |
| H | -1.523981000 | 2.838597000  | -0.589504000 |
| H | -0.211473000 | 4.037657000  | -0.702106000 |
| H | 0.936286000  | 1.289056000  | -2.791720000 |
| H | 0.474980000  | 3.007614000  | -2.748809000 |
| H | -0.763045000 | 1.735012000  | -2.608523000 |
| H | 1.390465000  | -0.852909000 | -2.835178000 |
| H | -0.329811000 | -1.201850000 | -3.057738000 |
| H | 0.869949000  | -2.513899000 | -3.200511000 |
| H | -0.748435000 | -3.050675000 | 0.022500000  |
| H | -0.300748000 | -3.818327000 | -1.524228000 |
| H | -1.512323000 | -2.518881000 | -1.493663000 |
| H | -0.558684000 | -2.132243000 | 2.225932000  |
| H | -1.657044000 | -0.792078000 | 2.672105000  |
| H | -0.397180000 | -1.322202000 | 3.804490000  |
| O | -2.833759000 | 1.027626000  | 1.097478000  |
| S | -2.510492000 | 0.041934000  | 0.014127000  |
| C | -3.567103000 | -1.405613000 | 0.313468000  |
| H | -3.575600000 | -2.059649000 | -0.561422000 |
| H | -3.175226000 | -1.937779000 | 1.181579000  |
| H | -4.568566000 | -1.023864000 | 0.531134000  |
| C | -3.365587000 | 0.588264000  | -1.488266000 |
| H | -2.947824000 | 1.554784000  | -1.775134000 |
| H | -3.202821000 | -0.144760000 | -2.284124000 |
| H | -4.429423000 | 0.700113000  | -1.262394000 |

[Cu<sup>I</sup>(PMDTA)(DMSO-κS)]<sup>+</sup>  
E=-2714.188392 a.u.

M06/6-311+G(d,p)

|    |         |          |          |
|----|---------|----------|----------|
| Cu | 0.04258 | -0.07993 | -0.39721 |
| N  | 1.40178 | -1.62496 | -0.76912 |
| N  | 1.23203 | 0.29957  | 1.44426  |
| N  | 0.20309 | 2.00732  | -0.72098 |

|   |          |          |          |
|---|----------|----------|----------|
| C | 1.97971  | -1.88088 | 0.56812  |
| C | 2.37884  | -0.60447 | 1.28728  |
| H | 2.84796  | -2.55540 | 0.48376  |
| H | 1.21955  | -2.41212 | 1.15511  |
| H | 3.16011  | -0.08779 | 0.72014  |
| H | 2.82577  | -0.86456 | 2.25941  |
| C | 1.56127  | 1.73095  | 1.34992  |
| C | 0.46351  | 2.50688  | 0.64737  |
| H | 2.50600  | 1.84014  | 0.80753  |
| H | 1.72790  | 2.16714  | 2.34648  |
| H | 0.72776  | 3.57721  | 0.61290  |
| H | -0.47525 | 2.41907  | 1.20720  |
| C | 1.30402  | 2.34870  | -1.62883 |
| C | -1.02801 | 2.63083  | -1.22907 |
| C | 2.44548  | -1.24163 | -1.72901 |
| C | 0.74230  | -2.84087 | -1.26027 |
| H | -1.86241 | 2.40482  | -0.55919 |
| H | -1.24435 | 2.24882  | -2.23128 |
| H | -0.91527 | 3.72407  | -1.29522 |
| H | 2.24217  | 1.89849  | -1.29625 |
| H | 1.44242  | 3.43969  | -1.69057 |
| H | 1.08141  | 1.96895  | -2.62972 |
| H | 2.96233  | -0.33717 | -1.40175 |
| H | 1.98883  | -1.03878 | -2.70127 |
| H | 3.18715  | -2.04688 | -1.84821 |
| C | 0.47768  | 0.01026  | 2.66538  |
| H | 0.21043  | -1.05067 | 2.69848  |
| H | -0.45078 | 0.58857  | 2.68704  |
| H | 1.06769  | 0.24122  | 3.56617  |
| H | -0.04249 | -3.14606 | -0.56218 |
| H | 1.45873  | -3.67067 | -1.36481 |
| H | 0.29102  | -2.64656 | -2.23718 |
| O | -2.61224 | 0.67875  | 1.07608  |
| S | -2.15099 | -0.42225 | 0.17449  |
| C | -3.30843 | -0.55019 | -1.20381 |
| H | -4.31773 | -0.66184 | -0.79876 |
| H | -3.23449 | 0.37481  | -1.77774 |
| H | -3.02836 | -1.40501 | -1.82596 |
| C | -2.55765 | -1.98688 | 0.97993  |
| H | -1.91819 | -2.07897 | 1.85985  |
| H | -3.60645 | -1.94207 | 1.28623  |
| H | -2.38295 | -2.81426 | 0.28714  |

[Cu<sup>I</sup>(TPMA)(DMSO-κS)]<sup>+</sup>  
E=-3108.726087 a.u.

M06/6-311+G(d,p)

|   |          |          |         |
|---|----------|----------|---------|
| N | -0.03512 | -1.64419 | 1.19650 |
| C | 0.06062  | -1.02579 | 2.50394 |
| C | -1.28060 | -2.32776 | 0.93695 |
| C | 1.14207  | -2.37438 | 0.77738 |
| C | 1.06330  | 0.10125  | 2.50711 |
| H | 0.31419  | -1.74941 | 3.29912 |
| H | -0.92821 | -0.61848 | 2.75770 |

|    |          |          |          |
|----|----------|----------|----------|
| N  | 1.13317  | 0.86022  | 1.40398  |
| C  | 1.87679  | 0.32718  | 3.60721  |
| C  | 2.78980  | 1.37000  | 3.57035  |
| C  | 2.87967  | 2.13842  | 2.42160  |
| C  | 2.03803  | 1.84506  | 1.36108  |
| H  | 2.10061  | 2.40082  | 0.42571  |
| H  | 3.59656  | 2.94676  | 2.33517  |
| H  | 3.43507  | 1.56595  | 4.42058  |
| H  | 1.79580  | -0.31562 | 4.47854  |
| C  | 1.39011  | -2.28490 | -0.70967 |
| H  | 1.11277  | -3.43400 | 1.08540  |
| H  | 2.01463  | -1.93687 | 1.28162  |
| C  | 2.04582  | -3.31481 | -1.37019 |
| C  | 2.35362  | -3.17166 | -2.71288 |
| C  | 1.99417  | -1.99958 | -3.35933 |
| C  | 1.32801  | -1.02917 | -2.63330 |
| N  | 1.02014  | -1.16224 | -1.34002 |
| H  | 2.86850  | -3.96345 | -3.24714 |
| H  | 2.31581  | -4.21573 | -0.82740 |
| H  | 1.03736  | -0.09259 | -3.10304 |
| H  | 2.22160  | -1.83615 | -4.40622 |
| C  | -2.42967 | -1.37667 | 0.71859  |
| H  | -1.54400 | -3.04965 | 1.73101  |
| H  | -1.15597 | -2.91549 | 0.01595  |
| C  | -3.72038 | -1.73902 | 1.08075  |
| N  | -2.16106 | -0.20498 | 0.12757  |
| C  | -3.17992 | 0.62080  | -0.12349 |
| C  | -4.76947 | -0.87721 | 0.80996  |
| C  | -4.49500 | 0.33273  | 0.19102  |
| H  | -5.28019 | 1.04394  | -0.03787 |
| H  | -2.92561 | 1.56560  | -0.60008 |
| H  | -5.78554 | -1.14218 | 1.08316  |
| H  | -3.89233 | -2.69289 | 1.57015  |
| Cu | -0.10533 | 0.27400  | -0.25402 |
| O  | 1.41990  | 2.61464  | -1.79819 |
| S  | -0.01291 | 2.28363  | -1.51152 |
| C  | -0.93016 | 2.50976  | -3.05642 |
| H  | -2.00050 | 2.38239  | -2.87546 |
| H  | -0.70471 | 3.50814  | -3.44092 |
| H  | -0.57772 | 1.75247  | -3.75834 |
| C  | -0.71051 | 3.69906  | -0.62426 |
| H  | -0.43657 | 4.60459  | -1.17289 |
| H  | -1.79577 | 3.59830  | -0.54344 |
| H  | -0.26154 | 3.71070  | 0.37060  |

*Coordinates of the copper(II) complexes*  
*[Cu<sup>II</sup>L]<sup>+</sup>*

[Cu<sup>II</sup>(Me<sub>6</sub>TREN)]<sup>2+</sup>  
E=-2333.867100 a.u.

M06/6-311+G(d,p)

|    |              |              |              |
|----|--------------|--------------|--------------|
| Cu | -1.258607000 | 0.674736000  | -1.284136000 |
| N  | -3.081847000 | -0.203708000 | -1.040001000 |
| N  | -0.660165000 | -0.331917000 | 0.412959000  |
| N  | 0.587123000  | 0.355336000  | -2.030229000 |
| N  | -1.266185000 | 2.562774000  | -0.183742000 |
| C  | -3.080387000 | -0.825556000 | 0.316020000  |
| C  | -1.707274000 | -1.346416000 | 0.686772000  |
| H  | -3.817591000 | -1.639867000 | 0.348542000  |
| H  | -3.420627000 | -0.071323000 | 1.030024000  |
| H  | -1.466710000 | -2.238452000 | 0.100738000  |
| H  | -1.691233000 | -1.650233000 | 1.741644000  |
| C  | 0.670069000  | -0.916228000 | 0.101208000  |
| C  | 1.427492000  | -0.019709000 | -0.857461000 |
| H  | 0.511000000  | -1.904947000 | -0.337471000 |
| H  | 1.254481000  | -1.072034000 | 1.016933000  |
| H  | 2.346030000  | -0.514723000 | -1.202326000 |
| H  | 1.737323000  | 0.907860000  | -0.366442000 |
| C  | -1.468931000 | 1.969524000  | 1.155977000  |
| C  | -0.579750000 | 0.757163000  | 1.430513000  |
| H  | -2.526745000 | 1.711250000  | 1.252407000  |
| H  | -1.266097000 | 2.718585000  | 1.936764000  |
| H  | -0.834904000 | 0.347595000  | 2.416391000  |
| H  | 0.464647000  | 1.076006000  | 1.492903000  |
| C  | 0.433879000  | -0.796964000 | -2.953702000 |
| C  | 1.223186000  | 1.457280000  | -2.785363000 |
| C  | -2.374988000 | 3.488232000  | -0.499971000 |
| C  | -0.025843000 | 3.362295000  | -0.193771000 |
| C  | -3.062402000 | -1.252975000 | -2.091680000 |
| C  | -4.318187000 | 0.587596000  | -1.221424000 |
| H  | 0.845061000  | 2.756712000  | 0.063851000  |
| H  | -0.098336000 | 4.179278000  | 0.537178000  |
| H  | 0.121355000  | 3.805042000  | -1.180853000 |
| H  | 1.387239000  | 2.317167000  | -2.137943000 |
| H  | 0.584392000  | 1.745559000  | -3.623605000 |
| H  | 2.191108000  | 1.127120000  | -3.183177000 |
| H  | 0.002654000  | -1.659794000 | -2.442361000 |
| H  | 1.413929000  | -1.086637000 | -3.354479000 |
| H  | -0.209441000 | -0.514864000 | -3.791580000 |
| H  | -2.199509000 | -1.911889000 | -1.975405000 |
| H  | -3.030433000 | -0.784723000 | -3.079806000 |
| H  | -3.972775000 | -1.863321000 | -2.030964000 |
| H  | -4.430913000 | 1.308308000  | -0.410898000 |
| H  | -5.191467000 | -0.076808000 | -1.210836000 |
| H  | -4.289615000 | 1.111254000  | -2.180252000 |
| H  | -3.329582000 | 2.963382000  | -0.501234000 |
| H  | -2.212908000 | 3.929455000  | -1.485602000 |
| H  | -2.423660000 | 4.298858000  | 0.239402000  |

[Cu<sup>II</sup>(PMDETA)]<sup>2+</sup>  
E=-2160.637838 a.u.

M06/6-311+G(d,p)

|    |              |              |              |
|----|--------------|--------------|--------------|
| Cu | -1.050860000 | -0.360758000 | -1.789414000 |
|----|--------------|--------------|--------------|

|   |              |              |              |
|---|--------------|--------------|--------------|
| N | -2.924333000 | -0.778734000 | -1.410503000 |
| N | -0.535310000 | -0.988692000 | 0.053422000  |
| N | 0.830987000  | -0.378429000 | -2.324685000 |
| C | -2.968580000 | -1.252410000 | 0.010238000  |
| C | -1.656342000 | -1.905360000 | 0.393536000  |
| H | -3.805877000 | -1.948576000 | 0.141787000  |
| H | -3.176914000 | -0.386259000 | 0.644476000  |
| H | -1.502155000 | -2.841719000 | -0.153569000 |
| H | -1.636958000 | -2.146313000 | 1.464486000  |
| C | 0.775025000  | -1.646188000 | -0.198350000 |
| C | 1.609809000  | -0.764369000 | -1.104309000 |
| H | 0.578835000  | -2.619894000 | -0.660163000 |
| H | 1.293200000  | -1.833974000 | 0.751175000  |
| H | 2.535092000  | -1.272649000 | -1.401835000 |
| H | 1.906603000  | 0.155626000  | -0.593035000 |
| C | 0.928020000  | -1.433914000 | -3.369015000 |
| C | 1.328095000  | 0.908649000  | -2.871013000 |
| C | -3.273301000 | -1.881761000 | -2.346260000 |
| C | -3.860599000 | 0.355551000  | -1.607896000 |
| H | 1.192337000  | 1.704855000  | -2.134675000 |
| H | 0.783565000  | 1.157079000  | -3.784963000 |
| H | 2.394940000  | 0.823432000  | -3.112325000 |
| H | 0.598000000  | -2.399659000 | -2.974699000 |
| H | 1.967512000  | -1.529663000 | -3.706745000 |
| H | 0.309889000  | -1.162618000 | -4.229523000 |
| H | -2.615195000 | -2.742175000 | -2.192490000 |
| H | -3.182065000 | -1.534849000 | -3.379454000 |
| H | -4.310171000 | -2.198843000 | -2.178528000 |
| C | -0.427893000 | 0.147719000  | 0.992264000  |
| H | -1.380574000 | 0.674146000  | 1.072350000  |
| H | 0.330698000  | 0.856554000  | 0.655760000  |
| H | -0.146308000 | -0.227138000 | 1.984824000  |
| H | -3.566446000 | 1.197585000  | -0.976214000 |
| H | -4.879463000 | 0.048004000  | -1.341471000 |
| H | -3.853004000 | 0.662835000  | -2.656254000 |

[Cu<sup>II</sup>(TPMA)]<sup>2+</sup>  
E=-2555.213430 a.u.

|                  |              |              |              |
|------------------|--------------|--------------|--------------|
| M06/6-311+G(d,p) |              |              |              |
| N                | -3.222494000 | 0.768047000  | -0.819513000 |
| C                | -4.629432000 | 0.473930000  | -1.179926000 |
| C                | -2.886691000 | 2.209700000  | -0.889780000 |
| C                | -2.242931000 | -0.098829000 | -1.515983000 |
| C                | -5.113370000 | -0.771664000 | -0.490741000 |
| H                | -4.723393000 | 0.397478000  | -2.271823000 |
| H                | -5.239436000 | 1.328430000  | -0.860056000 |
| N                | -4.571587000 | -1.020587000 | 0.717996000  |
| C                | -6.091982000 | -1.581766000 | -1.032994000 |
| C                | -6.539825000 | -2.672560000 | -0.298181000 |
| C                | -5.985837000 | -2.924717000 | 0.947076000  |
| C                | -4.997256000 | -2.080047000 | 1.417985000  |
| H                | -4.529757000 | -2.251649000 | 2.382910000  |

|    |              |              |              |
|----|--------------|--------------|--------------|
| H  | -6.306659000 | -3.766976000 | 1.548587000  |
| H  | -7.310906000 | -3.321928000 | -0.699319000 |
| H  | -6.502713000 | -1.361137000 | -2.013029000 |
| C  | -0.991248000 | -0.261718000 | -0.699001000 |
| H  | -2.028168000 | 0.311708000  | -2.512100000 |
| H  | -2.713255000 | -1.079545000 | -1.662930000 |
| C  | 0.242206000  | -0.491310000 | -1.276802000 |
| C  | 1.337682000  | -0.708113000 | -0.450193000 |
| C  | 1.166667000  | -0.674818000 | 0.924872000  |
| C  | -0.094882000 | -0.421557000 | 1.431695000  |
| N  | -1.155616000 | -0.224430000 | 0.638200000  |
| H  | 2.316671000  | -0.895507000 | -0.878712000 |
| H  | 0.345213000  | -0.506156000 | -2.357079000 |
| H  | -0.266853000 | -0.374462000 | 2.502807000  |
| H  | 1.997129000  | -0.836132000 | 1.601977000  |
| C  | -3.436548000 | 2.949396000  | 0.298222000  |
| H  | -3.254174000 | 2.629403000  | -1.836208000 |
| H  | -1.792562000 | 2.295577000  | -0.899138000 |
| C  | -3.789120000 | 4.283617000  | 0.238047000  |
| N  | -3.513456000 | 2.243219000  | 1.443562000  |
| C  | -3.937428000 | 2.852405000  | 2.558312000  |
| C  | -4.216597000 | 4.915141000  | 1.399441000  |
| C  | -4.289945000 | 4.189506000  | 2.578117000  |
| H  | -4.621135000 | 4.645931000  | 3.503394000  |
| H  | -3.993911000 | 2.247226000  | 3.458126000  |
| H  | -4.494991000 | 5.963614000  | 1.380250000  |
| H  | -3.725645000 | 4.823632000  | -0.701205000 |
| Cu | -3.066221000 | 0.289748000  | 1.102277000  |

*Coordinates of the copper(II) complexes  
with coordinated solvent molecules  
[Cu<sup>II</sup>LS]<sup>2+</sup>*

[Cu<sup>II</sup>(Me<sub>6</sub>TREN)(MeCN)]<sup>+</sup>  
E=-2466.631869 a.u.

|                  |              |              |              |
|------------------|--------------|--------------|--------------|
| M06/6-311+G(d,p) |              |              |              |
| Cu               | -0.122982000 | 0.046742000  | -0.057261000 |
| N                | 0.065935000  | -1.539354000 | -1.495791000 |
| N                | 1.925897000  | 0.088680000  | -0.094711000 |
| N                | 0.000837000  | 2.164181000  | -0.369196000 |
| N                | 0.131623000  | -0.755498000 | 1.992235000  |
| C                | 1.384947000  | -2.110848000 | -1.160652000 |
| C                | 2.423863000  | -1.027313000 | -0.957929000 |
| H                | 1.720425000  | -2.798577000 | -1.952460000 |
| H                | 1.261104000  | -2.713781000 | -0.255493000 |
| H                | 2.717257000  | -0.602765000 | -1.921497000 |
| H                | 3.333915000  | -1.458878000 | -0.525326000 |
| C                | 2.329732000  | 1.417536000  | -0.634591000 |
| C                | 1.419468000  | 2.502996000  | -0.113992000 |
| H                | 2.274552000  | 1.369626000  | -1.725843000 |

|   |              |              |              |
|---|--------------|--------------|--------------|
| H | 3.377188000  | 1.628397000  | -0.380230000 |
| H | 1.674702000  | 3.467150000  | -0.577383000 |
| H | 1.542624000  | 2.638829000  | 0.965659000  |
| C | 1.572409000  | -1.071706000 | 2.073473000  |
| C | 2.383942000  | -0.048505000 | 1.318066000  |
| H | 1.731018000  | -2.072691000 | 1.659951000  |
| H | 1.905134000  | -1.114241000 | 3.121473000  |
| H | 3.451093000  | -0.305107000 | 1.331706000  |
| H | 2.293681000  | 0.928951000  | 1.799410000  |
| C | -0.357697000 | 2.449757000  | -1.772635000 |
| C | -0.862482000 | 2.982052000  | 0.501373000  |
| C | -0.659089000 | -1.952370000 | 2.316483000  |
| C | -0.219536000 | 0.298654000  | 2.959837000  |
| C | 0.054651000  | -0.996678000 | -2.866361000 |
| C | -0.958358000 | -2.594008000 | -1.413736000 |
| H | 0.397211000  | 1.188619000  | 2.811139000  |
| H | -0.071277000 | -0.052642000 | 3.990748000  |
| H | -1.269648000 | 0.576909000  | 2.835964000  |
| H | -0.661438000 | 2.762461000  | 1.551912000  |
| H | -1.911343000 | 2.770858000  | 0.286538000  |
| H | -0.682533000 | 4.050960000  | 0.323296000  |
| H | 0.300909000  | 1.919007000  | -2.462752000 |
| H | -0.280591000 | 3.526505000  | -1.975943000 |
| H | -1.386294000 | 2.132505000  | -1.960429000 |
| H | 0.835586000  | -0.245069000 | -3.000710000 |
| H | -0.914663000 | -0.531941000 | -3.066297000 |
| H | 0.217282000  | -1.797673000 | -3.601098000 |
| H | -1.039595000 | -2.969313000 | -0.391315000 |
| H | -0.704494000 | -3.429796000 | -2.080000000 |
| H | -1.925116000 | -2.192304000 | -1.722321000 |
| H | -0.407837000 | -2.770670000 | 1.637240000  |
| H | -1.724843000 | -1.728827000 | 2.227427000  |
| H | -0.460705000 | -2.286506000 | 3.344668000  |
| N | -2.120896000 | 0.034497000  | -0.040075000 |
| C | -3.270417000 | 0.004908000  | -0.020055000 |
| C | -4.708429000 | -0.032291000 | 0.003491000  |
| H | -5.085349000 | 0.567573000  | 0.836171000  |
| H | -5.108683000 | 0.368556000  | -0.931624000 |
| H | -5.054603000 | -1.062281000 | 0.124139000  |

[Cu<sup>II</sup>(PMDTA)(MeCN)]<sup>2+</sup>

E=-2293.408945 a.u.

M06/6-311+G(d,p)

|    |              |              |              |
|----|--------------|--------------|--------------|
| Cu | -1.114290000 | -0.160554000 | -1.965850000 |
| N  | -3.025064000 | -0.762031000 | -1.473078000 |
| N  | -0.593033000 | -0.813763000 | -0.130659000 |
| N  | 0.880896000  | -0.374268000 | -2.444496000 |
| C  | -3.008342000 | -1.153158000 | -0.037860000 |
| C  | -1.664000000 | -1.730824000 | 0.331039000  |
| H  | -3.813509000 | -1.871668000 | 0.165068000  |
| H  | -3.228931000 | -0.260712000 | 0.555398000  |
| H  | -1.506904000 | -2.700309000 | -0.153105000 |
| H  | -1.587808000 | -1.894727000 | 1.414076000  |

|   |              |              |              |
|---|--------------|--------------|--------------|
| C | 0.719344000  | -1.493356000 | -0.261019000 |
| C | 1.605068000  | -0.694096000 | -1.184998000 |
| H | 0.539036000  | -2.496801000 | -0.660442000 |
| H | 1.186350000  | -1.617513000 | 0.724944000  |
| H | 2.530196000  | -1.240334000 | -1.411946000 |
| H | 1.905429000  | 0.250594000  | -0.721932000 |
| C | 0.896781000  | -1.529113000 | -3.370330000 |
| C | 1.518330000  | 0.787564000  | -3.094541000 |
| C | -3.255103000 | -1.940596000 | -2.338619000 |
| C | -4.093891000 | 0.230868000  | -1.697816000 |
| H | 1.402911000  | 1.676230000  | -2.468134000 |
| H | 1.059158000  | 0.966497000  | -4.067338000 |
| H | 2.588024000  | 0.593726000  | -3.245269000 |
| H | 0.471373000  | -2.416595000 | -2.892707000 |
| H | 1.926085000  | -1.758175000 | -3.675767000 |
| H | 0.312430000  | -1.293506000 | -4.263564000 |
| H | -2.500861000 | -2.711371000 | -2.154925000 |
| H | -3.207060000 | -1.641607000 | -3.388921000 |
| H | -4.246170000 | -2.369897000 | -2.141865000 |
| C | -0.494800000 | 0.378660000  | 0.742898000  |
| H | -1.451543000 | 0.903432000  | 0.783908000  |
| H | 0.256428000  | 1.072812000  | 0.360508000  |
| H | -0.212840000 | 0.076845000  | 1.759530000  |
| H | -3.867383000 | 1.153042000  | -1.155847000 |
| H | -5.054515000 | -0.164429000 | -1.343584000 |
| H | -4.181042000 | 0.447436000  | -2.763036000 |
| N | -1.617896000 | 0.882530000  | -3.574230000 |
| C | -1.906115000 | 1.547748000  | -4.467495000 |
| C | -2.266147000 | 2.376235000  | -5.584384000 |
| H | -1.469846000 | 3.098070000  | -5.786225000 |
| H | -2.420164000 | 1.757605000  | -6.473031000 |
| H | -3.189109000 | 2.919882000  | -5.364236000 |

[Cu<sup>II</sup>(TPMA)(MeCN)]<sup>2+</sup>

E=-2687.976538 a.u.

M06/6-311+G(d,p)

|   |              |              |              |
|---|--------------|--------------|--------------|
| N | -3.208264000 | 0.721441000  | -0.627477000 |
| C | -4.611527000 | 0.471299000  | -1.018530000 |
| C | -2.848810000 | 2.150195000  | -0.745829000 |
| C | -2.266841000 | -0.147026000 | -1.365032000 |
| C | -5.117330000 | -0.790099000 | -0.382103000 |
| H | -4.702912000 | 0.439513000  | -2.113287000 |
| H | -5.214522000 | 1.319181000  | -0.668830000 |
| N | -4.581534000 | -1.086529000 | 0.813614000  |
| C | -6.098104000 | -1.574114000 | -0.962126000 |
| C | -6.549553000 | -2.693343000 | -0.276544000 |
| C | -5.998349000 | -2.997698000 | 0.958843000  |
| C | -5.012691000 | -2.170716000 | 1.465763000  |
| H | -4.544745000 | -2.378921000 | 2.423280000  |
| H | -6.320060000 | -3.866222000 | 1.521229000  |
| H | -7.319544000 | -3.324996000 | -0.706916000 |
| H | -6.503209000 | -1.310919000 | -1.933979000 |

|    |              |              |              |
|----|--------------|--------------|--------------|
| C  | -0.985474000 | -0.302921000 | -0.599616000 |
| H  | -2.091724000 | 0.250519000  | -2.374566000 |
| H  | -2.738717000 | -1.130992000 | -1.483178000 |
| C  | 0.228284000  | -0.533454000 | -1.221446000 |
| C  | 1.355171000  | -0.725746000 | -0.434304000 |
| C  | 1.233711000  | -0.669720000 | 0.945827000  |
| C  | -0.012806000 | -0.422178000 | 1.491134000  |
| N  | -1.102578000 | -0.245904000 | 0.737405000  |
| H  | 2.319696000  | -0.910670000 | -0.895370000 |
| H  | 0.289242000  | -0.564272000 | -2.304599000 |
| H  | -0.150865000 | -0.357123000 | 2.566250000  |
| H  | 2.091331000  | -0.808483000 | 1.593397000  |
| C  | -3.414736000 | 2.931506000  | 0.403573000  |
| H  | -3.184283000 | 2.549341000  | -1.713298000 |
| H  | -1.753809000 | 2.224199000  | -0.728486000 |
| C  | -3.754591000 | 4.268040000  | 0.297904000  |
| N  | -3.530678000 | 2.255018000  | 1.558378000  |
| C  | -3.984444000 | 2.894624000  | 2.640893000  |
| C  | -4.216068000 | 4.930261000  | 1.427004000  |
| C  | -4.333113000 | 4.232718000  | 2.619618000  |
| H  | -4.695362000 | 4.713309000  | 3.520688000  |
| H  | -4.072555000 | 2.307334000  | 3.550008000  |
| H  | -4.487885000 | 5.979226000  | 1.373389000  |
| H  | -3.657182000 | 4.782260000  | -0.652872000 |
| Cu | -3.046311000 | 0.230938000  | 1.345886000  |
| N  | -2.888528000 | -0.248333000 | 3.271061000  |
| C  | -2.797780000 | -0.525777000 | 4.382449000  |
| C  | -2.683992000 | -0.873203000 | 5.773862000  |
| H  | -3.677853000 | -0.947122000 | 6.222933000  |
| H  | -2.174749000 | -1.834794000 | 5.878326000  |
| H  | -2.110707000 | -0.108371000 | 6.304206000  |

[Cu<sup>II</sup>(Me<sub>6</sub>TREN)(DMSO-κO)]<sup>2+</sup>  
E=-2887.077612 a.u.

M06/6-311+G(d,p)

|    |             |              |              |
|----|-------------|--------------|--------------|
| Cu | 0.221577000 | 0.056206000  | -0.000286000 |
| N  | 0.228846000 | -1.405604000 | -1.603278000 |
| N  | 2.267268000 | 0.060125000  | -0.241854000 |
| N  | 0.381365000 | 2.186632000  | -0.185122000 |
| N  | 0.656396000 | -0.902476000 | 1.922981000  |
| C  | 1.550674000 | -2.034536000 | -1.405037000 |
| C  | 2.644788000 | -1.004054000 | -1.218895000 |
| H  | 1.799776000 | -2.682294000 | -2.260316000 |
| H  | 1.474293000 | -2.688005000 | -0.530241000 |
| H  | 2.874947000 | -0.523769000 | -2.173589000 |
| H  | 3.568373000 | -1.500500000 | -0.898737000 |
| C  | 2.651155000 | 1.412379000  | -0.732409000 |
| C  | 1.825622000 | 2.481982000  | -0.058152000 |
| H  | 2.487823000 | 1.436686000  | -1.813788000 |
| H  | 3.723605000 | 1.586994000  | -0.571298000 |
| H  | 2.060182000 | 3.467657000  | -0.486278000 |
| H  | 2.061770000 | 2.547225000  | 1.008975000  |

|   |              |              |              |
|---|--------------|--------------|--------------|
| C | 2.090576000  | -1.245797000 | 1.862264000  |
| C | 2.853811000  | -0.184617000 | 1.106226000  |
| H | 2.194250000  | -2.219480000 | 1.372606000  |
| H | 2.510504000  | -1.362068000 | 2.872617000  |
| H | 3.911596000  | -0.459287000 | 1.002229000  |
| H | 2.829834000  | 0.757045000  | 1.661314000  |
| C | -0.112588000 | 2.579299000  | -1.516116000 |
| C | -0.370782000 | 2.939864000  | 0.832450000  |
| C | -0.144196000 | -2.098335000 | 2.216024000  |
| C | 0.402893000  | 0.086343000  | 2.985366000  |
| C | 0.142696000  | -0.777574000 | -2.933706000 |
| C | -0.804310000 | -2.449286000 | -1.522781000 |
| H | 1.033884000  | 0.969162000  | 2.853774000  |
| H | 0.616120000  | -0.342702000 | 3.974658000  |
| H | -0.644579000 | 0.394688000  | 2.949591000  |
| H | -0.028988000 | 2.668267000  | 1.833060000  |
| H | -1.432126000 | 2.699702000  | 0.756283000  |
| H | -0.233155000 | 4.020672000  | 0.691206000  |
| H | 0.464709000  | 2.097611000  | -2.307855000 |
| H | -0.046465000 | 3.667984000  | -1.649727000 |
| H | -1.158887000 | 2.280046000  | -1.623818000 |
| H | 0.921871000  | -0.023713000 | -3.064615000 |
| H | -0.830825000 | -0.293524000 | -3.048986000 |
| H | 0.254476000  | -1.530231000 | -3.727222000 |
| H | -0.838279000 | -2.873117000 | -0.516230000 |
| H | -0.600057000 | -3.256480000 | -2.240296000 |
| H | -1.779283000 | -2.023641000 | -1.773155000 |
| H | 0.041723000  | -2.874253000 | 1.468495000  |
| H | -1.203910000 | -1.832209000 | 2.205819000  |
| H | 0.107511000  | -2.508153000 | 3.204484000  |
| O | -1.697302000 | 0.148374000  | 0.464422000  |
| S | -2.991881000 | -0.057318000 | -0.374556000 |
| C | -3.899494000 | -1.302780000 | 0.554492000  |
| H | -4.900914000 | -1.397893000 | 0.126658000  |
| H | -3.366681000 | -2.249974000 | 0.455077000  |
| H | -3.947689000 | -0.989140000 | 1.600467000  |
| C | -4.003990000 | 1.369550000  | 0.049507000  |
| H | -3.583606000 | 2.247746000  | -0.443075000 |
| H | -5.017102000 | 1.196154000  | -0.322906000 |
| H | -4.000164000 | 1.487544000  | 1.136150000  |

[Cu<sup>II</sup>(PMDTA)(DMSO-κO)]<sup>2+</sup>  
E=-2713.855768 a.u.

M06/6-311+G(d,p)

|    |              |              |              |
|----|--------------|--------------|--------------|
| Cu | -1.095141000 | 0.038311000  | -1.955442000 |
| N  | -3.037460000 | -0.441468000 | -1.454588000 |
| N  | -0.580653000 | -0.795972000 | -0.186845000 |
| N  | 0.880473000  | -0.255188000 | -2.484755000 |
| C  | -3.011414000 | -0.929830000 | -0.048503000 |
| C  | -1.715253000 | -1.648690000 | 0.236763000  |
| H  | -3.873160000 | -1.584840000 | 0.136564000  |
| H  | -3.130364000 | -0.063038000 | 0.608672000  |



|   |              |              |              |
|---|--------------|--------------|--------------|
| H | -1.657197000 | -2.588941000 | -0.321571000 |
| H | -1.632716000 | -1.901348000 | 1.302230000  |
| C | 0.657396000  | -1.575672000 | -0.425475000 |
| C | 1.596609000  | -0.767487000 | -1.287512000 |
| H | 0.373393000  | -2.508486000 | -0.924638000 |
| H | 1.130177000  | -1.848876000 | 0.527346000  |
| H | 2.463136000  | -1.368654000 | -1.592849000 |
| H | 1.992365000  | 0.091290000  | -0.737727000 |
| C | 0.815522000  | -1.291396000 | -3.536711000 |
| C | 1.577921000  | 0.934728000  | -3.008740000 |
| C | -3.406725000 | -1.538288000 | -2.377235000 |
| C | -4.025434000 | 0.648179000  | -1.563009000 |
| H | 1.549364000  | 1.737248000  | -2.267015000 |
| H | 1.082959000  | 1.275666000  | -3.917544000 |
| H | 2.624145000  | 0.687982000  | -3.231437000 |
| H | 0.331234000  | -2.198039000 | -3.160810000 |
| H | 1.825273000  | -1.552788000 | -3.879324000 |
| H | 0.244185000  | -0.910379000 | -4.386275000 |
| H | -2.706837000 | -2.373702000 | -2.284278000 |
| H | -3.386641000 | -1.177275000 | -3.408689000 |
| H | -4.418063000 | -1.902870000 | -2.154449000 |
| C | -0.345794000 | 0.299791000  | 0.780235000  |
| H | -1.255251000 | 0.887672000  | 0.919535000  |
| H | 0.435916000  | 0.970556000  | 0.418140000  |
| H | -0.038910000 | -0.112381000 | 1.749900000  |
| H | -3.688043000 | 1.516628000  | -0.990025000 |
| H | -4.998208000 | 0.320437000  | -1.173705000 |
| H | -4.161421000 | 0.926470000  | -2.610335000 |
| O | -1.327486000 | 1.233449000  | -3.468576000 |
| S | -2.428570000 | 1.602164000  | -4.511609000 |
| C | -1.489638000 | 1.734949000  | -6.038303000 |
| H | -0.634046000 | 2.392507000  | -5.864835000 |
| H | -1.167377000 | 0.732003000  | -6.322395000 |
| H | -2.145352000 | 2.141130000  | -6.813182000 |
| C | -2.719496000 | 3.350572000  | -4.208410000 |
| H | -3.240224000 | 3.442622000  | -3.253850000 |
| H | -1.755703000 | 3.864072000  | -4.177150000 |
| H | -3.350311000 | 3.740944000  | -5.011498000 |

[Cu<sup>II</sup>(TPMA)(DMSO-κO)]<sup>2+</sup>  
E=-3108.419313 a.u.

| M06/6-311+G(d,p) |              |              |              |
|------------------|--------------|--------------|--------------|
| N                | -1.576040000 | 0.163904000  | 1.131301000  |
| C                | -2.075756000 | -1.205934000 | 1.373892000  |
| C                | -1.084710000 | 0.804614000  | 2.365385000  |
| C                | -2.575768000 | 1.003528000  | 0.439684000  |
| C                | -2.002631000 | -2.022948000 | 0.115291000  |
| H                | -3.096652000 | -1.177241000 | 1.779933000  |
| H                | -1.438114000 | -1.666526000 | 2.139332000  |
| N                | -1.002533000 | -1.700497000 | -0.719552000 |
| C                | -2.876939000 | -3.060007000 | -0.156961000 |
| C                | -2.701010000 | -3.790093000 | -1.324652000 |

|    |              |              |              |
|----|--------------|--------------|--------------|
| C  | -1.670156000 | -3.451091000 | -2.188392000 |
| C  | -0.845972000 | -2.393029000 | -1.850392000 |
| H  | -0.038522000 | -2.066724000 | -2.500290000 |
| H  | -1.511911000 | -3.990700000 | -3.114643000 |
| H  | -3.370854000 | -4.609786000 | -1.562474000 |
| H  | -3.681705000 | -3.292228000 | 0.533238000  |
| C  | -1.902300000 | 2.124268000  | -0.298973000 |
| H  | -3.325141000 | 1.376354000  | 1.152161000  |
| H  | -3.105601000 | 0.368408000  | -0.282186000 |
| C  | -2.524069000 | 3.332512000  | -0.557353000 |
| C  | -1.847086000 | 4.279962000  | -1.313284000 |
| C  | -0.573263000 | 3.992346000  | -1.780533000 |
| C  | -0.015583000 | 2.765189000  | -1.470293000 |
| N  | -0.665430000 | 1.853448000  | -0.742979000 |
| H  | -2.310643000 | 5.235945000  | -1.533270000 |
| H  | -3.522246000 | 3.526353000  | -0.177957000 |
| H  | 0.976076000  | 2.479804000  | -1.809943000 |
| H  | -0.017320000 | 4.708155000  | -2.374412000 |
| C  | 0.257259000  | 0.254641000  | 2.752604000  |
| H  | -1.815249000 | 0.687279000  | 3.178475000  |
| H  | -0.990934000 | 1.880961000  | 2.170828000  |
| C  | 0.668419000  | 0.197032000  | 4.073283000  |
| N  | 1.043095000  | -0.146647000 | 1.739013000  |
| C  | 2.259782000  | -0.622322000 | 2.027123000  |
| C  | 1.938632000  | -0.279805000 | 4.360446000  |
| C  | 2.749771000  | -0.700674000 | 3.317584000  |
| H  | 3.743059000  | -1.094282000 | 3.498464000  |
| H  | 2.858464000  | -0.970343000 | 1.189294000  |
| H  | 2.286034000  | -0.333116000 | 5.386855000  |
| H  | 0.000497000  | 0.521957000  | 4.864679000  |
| Cu | 0.034859000  | 0.002071000  | -0.125659000 |
| O  | 1.426361000  | -0.016823000 | -1.510186000 |
| S  | 2.875268000  | -0.580385000 | -1.475953000 |
| C  | 3.899640000  | 0.898084000  | -1.417552000 |
| H  | 4.949534000  | 0.608367000  | -1.510605000 |
| H  | 3.603733000  | 1.563658000  | -2.232460000 |
| H  | 3.731075000  | 1.371492000  | -0.447550000 |
| C  | 3.158486000  | -1.047819000 | -3.187736000 |
| H  | 2.831070000  | -0.223888000 | -3.826234000 |
| H  | 4.223606000  | -1.254553000 | -3.319698000 |
| H  | 2.581536000  | -1.950863000 | -3.390206000 |

[Cu<sup>II</sup>(PMDETA)(MeCN)<sub>2</sub>]<sup>2+</sup>  
E=-2426.148905 a.u.

| M06/6-311+G(d,p) |          |          |          |
|------------------|----------|----------|----------|
| Cu               | -0.17894 | -0.03013 | 0.00000  |
| N                | -0.59118 | -0.26907 | 2.02909  |
| N                | 0.14066  | -2.07341 | 0.00000  |
| N                | -0.59118 | -0.26907 | -2.02909 |
| C                | -0.18933 | -1.65505 | 2.37641  |
| C                | -0.50061 | -2.58790 | 1.23331  |
| H                | -0.69428 | -1.97669 | 3.29753  |

|   |          |          |          |
|---|----------|----------|----------|
| H | 0.88400  | -1.64858 | 2.59069  |
| H | -1.58001 | -2.64457 | 1.05904  |
| H | -0.15632 | -3.60781 | 1.45071  |
| C | -0.50061 | -2.58790 | -1.23331 |
| C | -0.18933 | -1.65505 | -2.37641 |
| H | -1.58001 | -2.64457 | -1.05904 |
| H | -0.15632 | -3.60781 | -1.45071 |
| H | -0.69428 | -1.97669 | -3.29753 |
| H | 0.88400  | -1.64858 | -2.59069 |
| C | -2.04908 | -0.10098 | -2.20654 |
| C | 0.11777  | 0.68285  | -2.90187 |
| C | -2.04908 | -0.10098 | 2.20654  |
| C | 0.11777  | 0.68285  | 2.90187  |
| H | 1.19542  | 0.59171  | -2.74945 |
| H | -0.19081 | 1.70259  | -2.66581 |
| H | -0.11506 | 0.48033  | -3.95570 |
| H | -2.60227 | -0.78632 | -1.55870 |
| H | -2.32998 | -0.29938 | -3.24920 |
| H | -2.33646 | 0.92056  | -1.95468 |
| H | -2.60227 | -0.78632 | 1.55870  |
| H | -2.33646 | 0.92056  | 1.95468  |
| H | -2.32998 | -0.29938 | 3.24920  |
| C | 1.58153  | -2.40156 | 0.00000  |
| H | 2.06999  | -1.98397 | 0.88080  |
| H | 2.06999  | -1.98397 | -0.88080 |
| H | 1.71069  | -3.49134 | 0.00000  |
| H | 1.19542  | 0.59171  | 2.74945  |
| H | -0.11506 | 0.48033  | 3.95570  |
| H | -0.19081 | 1.70259  | 2.66581  |
| C | -1.15962 | 3.01546  | 0.00000  |
| C | -1.55588 | 4.39917  | 0.00000  |
| H | -1.16568 | 4.90133  | -0.88902 |
| H | -2.64637 | 4.47608  | 0.00000  |
| H | -1.16568 | 4.90133  | 0.88902  |
| N | -0.84897 | 1.90816  | 0.00000  |
| N | 1.94530  | 0.68533  | 0.00000  |
| C | 3.00411  | 1.13809  | 0.00000  |
| C | 4.33112  | 1.70034  | 0.00000  |
| H | 5.07787  | 0.90245  | 0.00000  |
| H | 4.47748  | 2.31927  | -0.88880 |
| H | 4.47748  | 2.31927  | 0.88880  |

[Cu<sup>II</sup>(PMDETA)(DMSO-κO)<sub>2</sub>]<sup>2+</sup>  
E=-3267.039063 a.u.

M06/6-311+G(d,p)

|    |          |          |          |
|----|----------|----------|----------|
| Cu | -0.61822 | -0.31930 | -0.01576 |
| N  | -1.10636 | -0.77647 | -1.98106 |
| N  | -2.35094 | 0.80493  | -0.02356 |
| N  | -0.95831 | -0.52359 | 2.02672  |
| C  | -2.23616 | 0.10304  | -2.35873 |
| C  | -3.14702 | 0.31689  | -1.17468 |
| H  | -2.78944 | -0.32647 | -3.20555 |

|   |          |          |          |
|---|----------|----------|----------|
| H | -1.82052 | 1.05518  | -2.70480 |
| H | -3.62433 | -0.62369 | -0.88089 |
| H | -3.95164 | 1.02403  | -1.41751 |
| C | -3.02639 | 0.56969  | 1.27388  |
| C | -1.99131 | 0.48052  | 2.36896  |
| H | -3.59507 | -0.36222 | 1.20210  |
| H | -3.75064 | 1.36768  | 1.48454  |
| H | -2.46084 | 0.23380  | 3.33205  |
| H | -1.48387 | 1.44335  | 2.50057  |
| C | -1.46952 | -1.89755 | 2.21226  |
| C | 0.21347  | -0.32520 | 2.89084  |
| C | -1.52096 | -2.19496 | -1.97818 |
| C | 0.00038  | -0.59943 | -2.93175 |
| H | 0.69672  | 0.62506  | 2.64918  |
| H | 0.92834  | -1.13586 | 2.73810  |
| H | -0.08212 | -0.32855 | 3.94879  |
| H | -2.36605 | -2.06318 | 1.60938  |
| H | -1.71792 | -2.07669 | 3.26715  |
| H | -0.70750 | -2.61069 | 1.89089  |
| H | -2.37380 | -2.34630 | -1.31111 |
| H | -0.69086 | -2.80959 | -1.62624 |
| H | -1.80795 | -2.51079 | -2.99017 |
| C | -2.04385 | 2.23838  | -0.18359 |
| H | -1.45616 | 2.40684  | -1.08732 |
| H | -1.46546 | 2.59801  | 0.66990  |
| H | -2.97415 | 2.81776  | -0.24646 |
| H | 0.39329  | 0.41846  | -2.85411 |
| H | -0.34336 | -0.78033 | -3.95919 |
| H | 0.79178  | -1.31174 | -2.69588 |
| O | 1.00971  | 1.17177  | -0.20106 |
| S | 1.43248  | 2.65226  | -0.26318 |
| C | 3.01580  | 2.62514  | -1.12391 |
| H | 3.68063  | 1.91959  | -0.61758 |
| H | 2.82511  | 2.31693  | -2.15382 |
| H | 3.44146  | 3.63182  | -1.11974 |
| C | 2.06371  | 3.01805  | 1.38705  |
| H | 1.21114  | 3.06211  | 2.06850  |
| H | 2.75483  | 2.22175  | 1.67892  |
| H | 2.56509  | 3.98917  | 1.37494  |
| C | 3.21401  | -1.32760 | -1.17687 |
| H | 4.28421  | -1.28917 | -0.95591 |
| H | 2.89664  | -0.40615 | -1.66767 |
| H | 2.97897  | -2.20246 | -1.78869 |
| H | 2.56227  | -3.78847 | 0.08066  |
| C | 2.83134  | -3.08260 | 0.86957  |
| H | 3.91037  | -3.07535 | 1.04373  |
| H | 2.31092  | -3.33075 | 1.79672  |
| S | 2.31053  | -1.43240 | 0.37573  |
| O | 0.83510  | -1.68322 | -0.04905 |

**Coordinates of the copper(II) complexes**  
**[Cu<sup>II</sup>LX]<sup>+</sup> (X=Cl, Br)**

[Cu<sup>II</sup>(Me<sub>6</sub>TREN)Cl]<sup>+</sup>  
 E=-2794.471194 a.u.

|                  |              |              |              |
|------------------|--------------|--------------|--------------|
| M06/6-311+G(d,p) |              |              |              |
| Cu               | 0.049611000  | -0.082335000 | -0.801080000 |
| N                | -1.670441000 | -1.366966000 | -0.517577000 |
| N                | 0.199828000  | -0.187473000 | 1.287667000  |
| N                | 2.159756000  | -0.527293000 | -0.760981000 |
| N                | -0.588144000 | 2.028651000  | -0.388605000 |
| C                | -2.108306000 | -1.054684000 | 0.848625000  |
| C                | -0.939910000 | -0.986644000 | 1.814396000  |
| H                | -2.833793000 | -1.803416000 | 1.208631000  |
| H                | -2.640216000 | -0.098656000 | 0.811173000  |
| H                | -0.575992000 | -1.996841000 | 2.022324000  |
| H                | -1.278003000 | -0.580426000 | 2.776577000  |
| C                | 1.502986000  | -0.829367000 | 1.592382000  |
| C                | 2.578813000  | -0.356679000 | 0.640374000  |
| H                | 1.374402000  | -1.911593000 | 1.495636000  |
| H                | 1.796869000  | -0.636972000 | 2.634512000  |
| H                | 3.517092000  | -0.898783000 | 0.837156000  |
| H                | 2.799710000  | 0.704776000  | 0.797588000  |
| C                | -0.810162000 | 2.080221000  | 1.061480000  |
| C                | 0.187796000  | 1.209387000  | 1.792685000  |
| H                | -1.832026000 | 1.744431000  | 1.266474000  |
| H                | -0.743427000 | 3.113531000  | 1.439820000  |
| H                | -0.015108000 | 1.211608000  | 2.873119000  |
| H                | 1.192648000  | 1.621724000  | 1.664877000  |
| C                | 2.310472000  | -1.926970000 | -1.192965000 |
| C                | 2.985253000  | 0.314758000  | -1.641358000 |
| C                | -1.786922000 | 2.455793000  | -1.117503000 |
| C                | 0.524500000  | 2.898730000  | -0.787969000 |
| C                | -1.232888000 | -2.763754000 | -0.639783000 |
| C                | -2.775837000 | -1.149718000 | -1.462155000 |
| H                | 1.432605000  | 2.652072000  | -0.230684000 |
| H                | 0.281866000  | 3.956059000  | -0.600462000 |
| H                | 0.723051000  | 2.761022000  | -1.854074000 |
| H                | 2.882103000  | 1.365434000  | -1.361313000 |
| H                | 2.649039000  | 0.195876000  | -2.672444000 |
| H                | 4.043392000  | 0.026055000  | -1.561721000 |
| H                | 1.750678000  | -2.600649000 | -0.539744000 |
| H                | 3.369976000  | -2.221406000 | -1.174276000 |
| H                | 1.925194000  | -2.028985000 | -2.209818000 |
| H                | -0.423697000 | -2.987349000 | 0.060277000  |
| H                | -0.870426000 | -2.935958000 | -1.656204000 |
| H                | -2.066976000 | -3.452323000 | -0.436447000 |
| H                | -3.106559000 | -0.110452000 | -1.421251000 |
| H                | -3.622332000 | -1.807941000 | -1.216791000 |
| H                | -2.431242000 | -1.354778000 | -2.476463000 |
| H                | -2.650006000 | 1.863323000  | -0.802972000 |

|    |              |              |              |
|----|--------------|--------------|--------------|
| H  | -1.631336000 | 2.306654000  | -2.188733000 |
| H  | -2.007457000 | 3.516772000  | -0.924690000 |
| Cl | -0.068022000 | -0.004119000 | -3.000960000 |

[Cu<sup>II</sup>(Me<sub>6</sub>TREN)Br]<sup>+</sup>  
 E=-4908.296321 a.u.

|                  |              |              |              |
|------------------|--------------|--------------|--------------|
| M06/6-311+G(d,p) |              |              |              |
| Cu               | 0.046890000  | -0.084105000 | -0.820987000 |
| N                | -1.680955000 | -1.368366000 | -0.520352000 |
| N                | 0.200672000  | -0.190132000 | 1.285238000  |
| N                | 2.167059000  | -0.528192000 | -0.767680000 |
| N                | -0.587632000 | 2.035176000  | -0.392070000 |
| C                | -2.106987000 | -1.054650000 | 0.850172000  |
| C                | -0.935196000 | -0.992123000 | 1.810684000  |
| H                | -2.832912000 | -1.801865000 | 1.212651000  |
| H                | -2.637204000 | -0.097639000 | 0.816140000  |
| H                | -0.571190000 | -2.003804000 | 2.011113000  |
| H                | -1.271117000 | -0.592937000 | 2.776880000  |
| C                | 1.504769000  | -0.826190000 | 1.588597000  |
| C                | 2.576476000  | -0.347898000 | 0.636176000  |
| H                | 1.382064000  | -1.909235000 | 1.493274000  |
| H                | 1.801046000  | -0.632149000 | 2.630031000  |
| H                | 3.519948000  | -0.879647000 | 0.836898000  |
| H                | 2.786794000  | 0.716412000  | 0.789109000  |
| C                | -0.813897000 | 2.074361000  | 1.058220000  |
| C                | 0.183846000  | 1.205165000  | 1.790178000  |
| H                | -1.834977000 | 1.733114000  | 1.257708000  |
| H                | -0.753645000 | 3.106197000  | 1.441993000  |
| H                | -0.023039000 | 1.207587000  | 2.870120000  |
| H                | 1.187791000  | 1.620828000  | 1.666911000  |
| C                | 2.324190000  | -1.932282000 | -1.184401000 |
| C                | 3.013236000  | 0.304233000  | -1.638198000 |
| C                | -1.786366000 | 2.478567000  | -1.111636000 |
| C                | 0.526772000  | 2.909900000  | -0.776612000 |
| C                | -1.241354000 | -2.765338000 | -0.640192000 |
| C                | -2.806902000 | -1.162903000 | -1.443697000 |
| H                | 1.435854000  | 2.648481000  | -0.227860000 |
| H                | 0.288043000  | 3.963976000  | -0.566631000 |
| H                | 0.722422000  | 2.794943000  | -1.845935000 |
| H                | 2.893684000  | 1.359276000  | -1.381510000 |
| H                | 2.713444000  | 0.164500000  | -2.677558000 |
| H                | 4.070260000  | 0.024545000  | -1.519995000 |
| H                | 1.749715000  | -2.599372000 | -0.537344000 |
| H                | 3.382691000  | -2.228052000 | -1.141542000 |
| H                | 1.959761000  | -2.044202000 | -2.207864000 |
| H                | -0.421964000 | -2.981837000 | 0.050089000  |
| H                | -0.891551000 | -2.944177000 | -1.659907000 |
| H                | -2.070810000 | -3.454553000 | -0.420564000 |
| H                | -3.130386000 | -0.120466000 | -1.417341000 |
| H                | -3.651142000 | -1.810376000 | -1.164195000 |
| H                | -2.490466000 | -1.393088000 | -2.461578000 |
| H                | -2.645818000 | 1.867593000  | -0.823372000 |

|    |              |              |              |
|----|--------------|--------------|--------------|
| H  | -1.626283000 | 2.370145000  | -2.186891000 |
| H  | -2.015702000 | 3.530492000  | -0.882300000 |
| Br | -0.081474000 | -0.005583000 | -3.167237000 |

[Cu<sup>II</sup>(PMDETA)Cl]<sup>+</sup>  
E=-2621.258374 a.u.

|                  |              |              |              |
|------------------|--------------|--------------|--------------|
| M06/6-311+G(d,p) |              |              |              |
| Cu               | -0.002551000 | -0.638276000 | -0.381703000 |
| N                | -2.055042000 | -0.537937000 | -0.005791000 |
| N                | -0.001044000 | 1.351290000  | 0.085548000  |
| N                | 2.050054000  | -0.540583000 | -0.006564000 |
| C                | -2.394098000 | 0.882380000  | 0.229332000  |
| C                | -1.229846000 | 1.608261000  | 0.864056000  |
| H                | -3.290927000 | 0.963263000  | 0.859604000  |
| H                | -2.650562000 | 1.332228000  | -0.734681000 |
| H                | -1.060036000 | 1.244905000  | 1.883544000  |
| H                | -1.430481000 | 2.687065000  | 0.933031000  |
| C                | 1.227835000  | 1.606077000  | 0.864549000  |
| C                | 2.391124000  | 0.879120000  | 0.229287000  |
| H                | 1.057356000  | 1.242199000  | 1.883751000  |
| H                | 1.429857000  | 2.684571000  | 0.934255000  |
| H                | 3.288071000  | 0.958420000  | 0.859567000  |
| H                | 2.648092000  | 1.329264000  | -0.734464000 |
| C                | 2.229863000  | -1.338743000 | 1.221770000  |
| C                | 2.899372000  | -1.090221000 | -1.078798000 |
| C                | -2.234975000 | -1.335106000 | 1.223148000  |
| C                | -2.905898000 | -1.087076000 | -1.077017000 |
| H                | 2.701158000  | -0.558534000 | -2.013458000 |
| H                | 2.664500000  | -2.144532000 | -1.224480000 |
| H                | 3.959404000  | -0.977026000 | -0.812992000 |
| H                | 1.609986000  | -0.942810000 | 2.032796000  |
| H                | 3.281645000  | -1.317195000 | 1.538817000  |
| H                | 1.929527000  | -2.369688000 | 1.025853000  |
| H                | -1.613872000 | -0.939632000 | 2.033458000  |
| H                | -1.936226000 | -2.366577000 | 1.027545000  |
| H                | -3.286462000 | -1.311932000 | 1.541068000  |
| C                | 0.000133000  | 2.109990000  | -1.178923000 |
| H                | -0.880525000 | 1.860075000  | -1.774063000 |
| H                | 0.880052000  | 1.857324000  | -1.774039000 |
| H                | 0.001820000  | 3.190266000  | -0.979017000 |
| H                | -2.707234000 | -0.556666000 | -2.012303000 |
| H                | -3.965578000 | -0.971816000 | -0.810716000 |
| H                | -2.672913000 | -2.141937000 | -1.221822000 |
| Cl               | -0.004049000 | -2.672540000 | -1.146324000 |

[Cu<sup>II</sup>(PMDETA)Br]<sup>+</sup>  
E=-4735.083792 a.u.

|                  |              |              |              |
|------------------|--------------|--------------|--------------|
| M06/6-311+G(d,p) |              |              |              |
| Cu               | -0.002540000 | -0.644008000 | -0.417356000 |
| N                | -2.058884000 | -0.541755000 | -0.009296000 |
| N                | -0.001063000 | 1.353485000  | 0.078659000  |

|    |              |              |              |
|----|--------------|--------------|--------------|
| N  | 2.054100000  | -0.544611000 | -0.010058000 |
| C  | -2.391087000 | 0.880894000  | 0.224373000  |
| C  | -1.228153000 | 1.607526000  | 0.858308000  |
| H  | -3.288769000 | 0.963860000  | 0.853598000  |
| H  | -2.645937000 | 1.329094000  | -0.740981000 |
| H  | -1.057594000 | 1.245101000  | 1.877879000  |
| H  | -1.432195000 | 2.685807000  | 0.927849000  |
| C  | 1.226556000  | 1.605681000  | 0.858061000  |
| C  | 2.388314000  | 0.877553000  | 0.223696000  |
| H  | 1.055726000  | 1.243272000  | 1.877593000  |
| H  | 1.432099000  | 2.683666000  | 0.927772000  |
| H  | 3.286295000  | 0.959218000  | 0.852663000  |
| H  | 2.643484000  | 1.325538000  | -0.741675000 |
| C  | 2.211752000  | -1.331950000 | 1.228396000  |
| C  | 2.943284000  | -1.090003000 | -1.052035000 |
| C  | -2.217130000 | -1.328701000 | 1.229330000  |
| C  | -2.949225000 | -1.086105000 | -1.050839000 |
| H  | 2.757293000  | -0.577336000 | -1.999534000 |
| H  | 2.739746000  | -2.151700000 | -1.189010000 |
| H  | 3.992752000  | -0.947929000 | -0.759191000 |
| H  | 1.569955000  | -0.936533000 | 2.022210000  |
| H  | 3.255565000  | -1.299078000 | 1.570438000  |
| H  | 1.926742000  | -2.367829000 | 1.034500000  |
| H  | -1.574487000 | -0.934050000 | 2.022841000  |
| H  | -1.933609000 | -2.364998000 | 1.035468000  |
| H  | -3.260765000 | -1.294361000 | 1.571769000  |
| C  | -0.000612000 | 2.118576000  | -1.181620000 |
| H  | -0.880897000 | 1.870682000  | -1.778386000 |
| H  | 0.879071000  | 1.869218000  | -1.778667000 |
| H  | 0.000316000  | 3.198134000  | -0.977230000 |
| H  | -2.763067000 | -0.573671000 | -1.998432000 |
| H  | -3.998377000 | -0.942755000 | -0.757491000 |
| H  | -2.746997000 | -2.148040000 | -1.187891000 |
| Br | -0.004134000 | -2.764020000 | -1.341895000 |

[Cu<sup>II</sup>(TPMA)Cl]<sup>+</sup>  
E=-3015.803353 a.u.

|                  |              |              |              |
|------------------|--------------|--------------|--------------|
| M06/6-311+G(d,p) |              |              |              |
| N                | 0.001438000  | 0.001072000  | 1.194952000  |
| C                | 1.336743000  | -0.450045000 | 1.619075000  |
| C                | -0.276698000 | 1.382868000  | 1.618912000  |
| C                | -1.057408000 | -0.930772000 | 1.615671000  |
| C                | 1.848923000  | -1.542637000 | 0.721310000  |
| H                | 1.330509000  | -0.764045000 | 2.673813000  |
| H                | 2.016791000  | 0.408971000  | 1.543700000  |
| N                | 1.449414000  | -1.469129000 | -0.554633000 |
| C                | 2.720198000  | -2.524388000 | 1.158797000  |
| C                | 3.202704000  | -3.441506000 | 0.234308000  |
| C                | 2.797047000  | -3.351955000 | -1.087572000 |
| C                | 1.910374000  | -2.349078000 | -1.444382000 |
| H                | 1.547748000  | -2.223136000 | -2.462110000 |
| H                | 3.154663000  | -4.049671000 | -1.835583000 |

|    |              |              |              |
|----|--------------|--------------|--------------|
| H  | 3.889188000  | -4.221440000 | 0.547201000  |
| H  | 3.019195000  | -2.566280000 | 2.201428000  |
| C  | -2.258351000 | -0.826162000 | 0.716425000  |
| H  | -1.327896000 | -0.770364000 | 2.670287000  |
| H  | -0.653298000 | -1.949060000 | 1.539414000  |
| C  | -3.544511000 | -1.091830000 | 1.151991000  |
| C  | -4.579258000 | -1.048876000 | 0.226755000  |
| C  | -4.297770000 | -0.737976000 | -1.093923000 |
| C  | -2.985665000 | -0.469952000 | -1.448649000 |
| N  | -1.993808000 | -0.513076000 | -0.558267000 |
| H  | -5.598116000 | -1.254826000 | 0.538104000  |
| H  | -3.731021000 | -1.333048000 | 2.193752000  |
| H  | -2.694607000 | -0.215712000 | -2.465397000 |
| H  | -5.080057000 | -0.696728000 | -1.842597000 |
| C  | 0.414944000  | 2.373154000  | 0.722906000  |
| H  | -0.003421000 | 1.534177000  | 2.674153000  |
| H  | -1.360580000 | 1.542135000  | 1.542234000  |
| C  | 0.826699000  | 3.618979000  | 1.161831000  |
| N  | 0.555900000  | 1.990514000  | -0.552543000 |
| C  | 1.090336000  | 2.830098000  | -1.440227000 |
| C  | 1.382791000  | 4.495709000  | 0.239548000  |
| C  | 1.513613000  | 4.099579000  | -1.081807000 |
| H  | 1.941551000  | 4.758303000  | -1.828227000 |
| H  | 1.166448000  | 2.453156000  | -2.457684000 |
| H  | 1.713120000  | 5.480405000  | 0.553688000  |
| H  | 0.709382000  | 3.898843000  | 2.204023000  |
| Cu | 0.004259000  | 0.003060000  | -0.913072000 |
| Cl | 0.007176000  | 0.004779000  | -3.112818000 |

[Cu<sup>II</sup>(TPMA)Br]<sup>+</sup>  
E=-5129.629167 a.u.

|                  |              |              |              |
|------------------|--------------|--------------|--------------|
| M06/6-311+G(d,p) |              |              |              |
| N                | 0.000685000  | 0.001216000  | 1.186884000  |
| C                | 1.338145000  | -0.440728000 | 1.607941000  |
| C                | -0.286357000 | 1.380425000  | 1.607387000  |
| C                | -1.051084000 | -0.937031000 | 1.604930000  |
| C                | 1.851008000  | -1.536821000 | 0.715537000  |
| H                | 1.338363000  | -0.750197000 | 2.664290000  |
| H                | 2.014640000  | 0.420496000  | 1.526328000  |
| N                | 1.450899000  | -1.476277000 | -0.561693000 |
| C                | 2.722932000  | -2.513068000 | 1.164388000  |
| C                | 3.206354000  | -3.441722000 | 0.252625000  |
| C                | 2.799761000  | -3.368120000 | -1.069754000 |
| C                | 1.913904000  | -2.368973000 | -1.438392000 |
| H                | 1.554524000  | -2.258412000 | -2.459013000 |
| H                | 3.156143000  | -4.074768000 | -1.809924000 |
| H                | 3.892899000  | -4.217556000 | 0.575343000  |
| H                | 3.020795000  | -2.541610000 | 2.207814000  |
| C                | -2.256051000 | -0.831132000 | 0.711767000  |
| H                | -1.319949000 | -0.785149000 | 2.661484000  |
| H                | -0.643308000 | -1.953260000 | 1.520975000  |
| C                | -3.537987000 | -1.099865000 | 1.158138000  |

|    |              |              |              |
|----|--------------|--------------|--------------|
| C  | -4.582781000 | -1.052110000 | 0.245048000  |
| C  | -4.314147000 | -0.732796000 | -1.076055000 |
| C  | -3.005619000 | -0.463487000 | -1.442090000 |
| N  | -2.002199000 | -0.511198000 | -0.564235000 |
| H  | -5.598271000 | -1.260164000 | 0.565838000  |
| H  | -3.712924000 | -1.346558000 | 2.200637000  |
| H  | -2.728777000 | -0.204050000 | -2.461430000 |
| H  | -5.103318000 | -0.686341000 | -1.817167000 |
| C  | 0.410241000  | 2.372628000  | 0.717963000  |
| H  | -0.022634000 | 1.534929000  | 2.664856000  |
| H  | -1.370062000 | 1.536083000  | 1.521222000  |
| C  | 0.818101000  | 3.615879000  | 1.168196000  |
| N  | 0.562754000  | 1.995766000  | -0.558606000 |
| C  | 1.107901000  | 2.842718000  | -1.433307000 |
| C  | 1.384033000  | 4.498818000  | 0.258343000  |
| C  | 1.528773000  | 4.109616000  | -1.063396000 |
| H  | 1.965385000  | 4.771384000  | -1.802072000 |
| H  | 1.195999000  | 2.475633000  | -2.453351000 |
| H  | 1.711297000  | 5.481401000  | 0.582132000  |
| H  | 0.689954000  | 3.888284000  | 2.211095000  |
| Cu | 0.002916000  | 0.003634000  | -0.930734000 |
| Br | 0.005754000  | 0.006595000  | -3.275152000 |

Coordinates of the copper(II) complexes  
[Cu<sup>II</sup>(PMDETA)SX]<sup>+</sup> (X=Cl, Br)

[Cu<sup>II</sup>(PMDETA)(MeCN)Br]<sup>+</sup> isomer I1  
E=-4867.802654 a.u.

|                  |              |              |              |
|------------------|--------------|--------------|--------------|
| M06/6-311+G(d,p) |              |              |              |
| Cu               | -0.078243000 | -0.641870000 | 0.143712000  |
| N                | -2.190367000 | -0.337050000 | 0.050895000  |
| N                | -0.002070000 | 1.400566000  | -0.021761000 |
| N                | 2.051472000  | -0.487790000 | 0.150986000  |
| C                | -2.419907000 | 1.132760000  | 0.056221000  |
| C                | -1.232989000 | 1.856038000  | 0.653731000  |
| H                | -3.333832000 | 1.371644000  | 0.613757000  |
| H                | -2.597772000 | 1.462064000  | -0.971284000 |
| H                | -1.132599000 | 1.615988000  | 1.717022000  |
| H                | -1.349123000 | 2.945980000  | 0.556958000  |
| C                | 1.225062000  | 1.768996000  | 0.711325000  |
| C                | 2.384162000  | 0.962091000  | 0.168878000  |
| H                | 1.058361000  | 1.539156000  | 1.768507000  |
| H                | 1.422720000  | 2.847716000  | 0.621263000  |
| H                | 3.285940000  | 1.136579000  | 0.768484000  |
| H                | 2.632159000  | 1.275934000  | -0.848891000 |
| C                | 2.635336000  | -1.147996000 | 1.333520000  |
| C                | 2.596568000  | -1.124603000 | -1.062894000 |
| C                | -2.876403000 | -0.953106000 | 1.201910000  |
| C                | -2.719564000 | -0.935019000 | -1.189464000 |
| H                | 2.126086000  | -0.700594000 | -1.954665000 |
| H                | 2.384520000  | -2.194382000 | -1.036691000 |

|    |              |              |              |
|----|--------------|--------------|--------------|
| H  | 3.682534000  | -0.967110000 | -1.120187000 |
| H  | 2.321876000  | -0.629953000 | 2.240996000  |
| H  | 3.731761000  | -1.126961000 | 1.265100000  |
| H  | 2.294224000  | -2.184721000 | 1.374014000  |
| H  | -2.572854000 | -0.456578000 | 2.124727000  |
| H  | -2.610780000 | -2.011076000 | 1.256882000  |
| H  | -3.963989000 | -0.855666000 | 1.079698000  |
| C  | 0.047794000  | 1.886385000  | -1.410777000 |
| H  | -0.829586000 | 1.558915000  | -1.968584000 |
| H  | 0.924443000  | 1.495798000  | -1.927638000 |
| H  | 0.087707000  | 2.984770000  | -1.428560000 |
| H  | -2.177437000 | -0.546364000 | -2.056307000 |
| H  | -3.787591000 | -0.701086000 | -1.299085000 |
| H  | -2.585143000 | -2.017117000 | -1.155498000 |
| Br | -0.159935000 | -2.984785000 | 0.062284000  |
| N  | -0.137533000 | -0.517338000 | 2.778458000  |
| C  | -0.197107000 | -1.513816000 | 3.354674000  |
| C  | -0.272763000 | -2.785201000 | 4.029585000  |
| H  | 0.531445000  | -3.435458000 | 3.674704000  |
| H  | -0.183456000 | -2.655385000 | 5.110372000  |
| H  | -1.227545000 | -3.266863000 | 3.802528000  |

[Cu<sup>II</sup>(PMDETA)(MeCN)Br]<sup>+</sup> isomer *I2*  
E=-4867.808234 a.u.

|                  |              |              |              |
|------------------|--------------|--------------|--------------|
| M06/6-311+G(d,p) |              |              |              |
| Cu               | 0.036253000  | -0.075305000 | -0.786159000 |
| N                | -1.960063000 | -0.630806000 | -0.406632000 |
| N                | -0.483786000 | 1.707406000  | 0.230140000  |
| N                | 2.004885000  | 0.422134000  | -0.224457000 |
| C                | -2.636297000 | 0.576427000  | 0.112570000  |
| C                | -1.702573000 | 1.372957000  | 0.991243000  |
| H                | -3.547552000 | 0.296556000  | 0.661324000  |
| H                | -2.955329000 | 1.176281000  | -0.746035000 |
| H                | -1.409026000 | 0.786409000  | 1.868481000  |
| H                | -2.196100000 | 2.283030000  | 1.362258000  |
| C                | 0.669782000  | 2.001452000  | 1.101558000  |
| C                | 1.947266000  | 1.792921000  | 0.325078000  |
| H                | 0.630474000  | 1.325230000  | 1.962355000  |
| H                | 0.614005000  | 3.027166000  | 1.494344000  |
| H                | 2.826234000  | 1.987417000  | 0.957058000  |
| H                | 2.000465000  | 2.492712000  | -0.515293000 |
| C                | 2.418599000  | -0.534345000 | 0.820732000  |
| C                | 2.975578000  | 0.376556000  | -1.329921000 |
| C                | -1.933411000 | -1.688725000 | 0.622183000  |
| C                | -2.681982000 | -1.127682000 | -1.589142000 |
| H                | 2.653761000  | 1.052779000  | -2.125861000 |
| H                | 3.026398000  | -0.638770000 | -1.725857000 |
| H                | 3.969643000  | 0.682600000  | -0.974097000 |
| H                | 1.703085000  | -0.535629000 | 1.648207000  |
| H                | 3.411071000  | -0.264474000 | 1.208409000  |
| H                | 2.449782000  | -1.539190000 | 0.397488000  |
| H                | -1.384551000 | -1.353356000 | 1.507035000  |

|    |              |              |              |
|----|--------------|--------------|--------------|
| H  | -1.426882000 | -2.567864000 | 0.221708000  |
| H  | -2.958207000 | -1.954077000 | 0.918010000  |
| C  | -0.743411000 | 2.844824000  | -0.668813000 |
| H  | -1.556742000 | 2.613116000  | -1.356144000 |
| H  | 0.133444000  | 3.059984000  | -1.279095000 |
| H  | -1.005394000 | 3.733675000  | -0.077914000 |
| H  | -2.670550000 | -0.364038000 | -2.370848000 |
| H  | -3.723399000 | -1.361938000 | -1.326435000 |
| H  | -2.189165000 | -2.026110000 | -1.963536000 |
| Br | 0.642816000  | -2.205087000 | -1.677626000 |
| N  | -0.119321000 | 0.876060000  | -2.913654000 |
| C  | 0.045282000  | 0.438320000  | -3.966507000 |
| C  | 0.264412000  | -0.163911000 | -5.256205000 |
| H  | 1.073631000  | 0.345111000  | -5.784314000 |
| H  | 0.536878000  | -1.213469000 | -5.108717000 |
| H  | -0.642384000 | -0.111421000 | -5.862679000 |

[Cu<sup>II</sup>(PMDETA)(MeCN)Br]<sup>+</sup> isomer *I3*  
E=-4867.795221 a.u.

|                  |              |              |              |
|------------------|--------------|--------------|--------------|
| M06/6-311+G(d,p) |              |              |              |
| Cu               | -1.113963000 | 0.615549000  | -1.659545000 |
| N                | -2.998630000 | -0.085299000 | -1.152448000 |
| N                | -0.553286000 | -0.072528000 | 0.282895000  |
| N                | 0.868953000  | 0.255061000  | -2.148124000 |
| C                | -2.966467000 | -0.338836000 | 0.306967000  |
| C                | -1.646966000 | -0.949979000 | 0.725595000  |
| H                | -3.806451000 | -0.988993000 | 0.591795000  |
| H                | -3.120257000 | 0.620977000  | 0.809673000  |
| H                | -1.510129000 | -1.935328000 | 0.267029000  |
| H                | -1.624103000 | -1.096509000 | 1.815470000  |
| C                | 0.745770000  | -0.739234000 | 0.109730000  |
| C                | 1.582416000  | 0.061747000  | -0.864064000 |
| H                | 0.569627000  | -1.752212000 | -0.268114000 |
| H                | 1.272541000  | -0.841231000 | 1.069900000  |
| H                | 2.549821000  | -0.429167000 | -1.044437000 |
| H                | 1.798467000  | 1.054219000  | -0.456720000 |
| C                | 0.904124000  | -0.990263000 | -2.938910000 |
| C                | 1.521371000  | 1.331999000  | -2.913277000 |
| C                | -3.204046000 | -1.351650000 | -1.881546000 |
| C                | -4.104339000 | 0.837041000  | -1.464853000 |
| H                | 1.445971000  | 2.271274000  | -2.362748000 |
| H                | 1.014726000  | 1.453753000  | -3.872062000 |
| H                | 2.575407000  | 1.078779000  | -3.093373000 |
| H                | 0.391475000  | -1.800923000 | -2.413667000 |
| H                | 1.945018000  | -1.291530000 | -3.121518000 |
| H                | 0.400304000  | -0.832683000 | -3.892012000 |
| H                | -2.377569000 | -2.044615000 | -1.701006000 |
| H                | -3.252161000 | -1.153823000 | -2.951881000 |
| H                | -4.139780000 | -1.826732000 | -1.555564000 |
| C                | -0.423106000 | 1.086278000  | 1.185171000  |
| H                | -1.360709000 | 1.639103000  | 1.241878000  |
| H                | 0.321942000  | 1.787186000  | 0.808925000  |

|    |              |             |              |
|----|--------------|-------------|--------------|
| H  | -0.134629000 | 0.741730000 | 2.188451000  |
| H  | -3.929373000 | 1.798207000 | -0.978492000 |
| H  | -5.057988000 | 0.407074000 | -1.128357000 |
| H  | -4.146934000 | 0.999948000 | -2.543015000 |
| N  | -1.680135000 | 0.477819000 | -3.906585000 |
| C  | -1.948527000 | 1.294641000 | -4.673734000 |
| C  | -2.273825000 | 2.368966000 | -5.574793000 |
| H  | -2.214100000 | 3.310457000 | -5.018971000 |
| H  | -1.569235000 | 2.397932000 | -6.408839000 |
| H  | -3.285057000 | 2.247188000 | -5.969123000 |
| Br | -1.322830000 | 3.026887000 | -1.646467000 |

[Cu<sup>II</sup>(PMDETA)(MeCN)Br]<sup>+</sup> isomer *I4*  
E=-4867.786952 a.u.

|                  |              |              |              |
|------------------|--------------|--------------|--------------|
| M06/6-311+G(d,p) |              |              |              |
| Cu               | -1.174560000 | 0.184399000  | -1.996730000 |
| N                | -3.117894000 | 0.163368000  | -1.197018000 |
| N                | -0.623995000 | -0.380150000 | -0.015391000 |
| N                | 0.883952000  | 0.557260000  | -2.196815000 |
| C                | -3.051745000 | -0.576515000 | 0.101681000  |
| C                | -1.736695000 | -1.308992000 | 0.252614000  |
| H                | -3.881345000 | -1.288334000 | 0.163894000  |
| H                | -3.198535000 | 0.136915000  | 0.918723000  |
| H                | -1.679988000 | -2.119556000 | -0.482161000 |
| H                | -1.651241000 | -1.750299000 | 1.257625000  |
| C                | 0.634530000  | -1.075551000 | -0.339763000 |
| C                | 1.567819000  | -0.121708000 | -1.052372000 |
| H                | 0.391881000  | -1.915591000 | -0.999747000 |
| H                | 1.109991000  | -1.478451000 | 0.567821000  |
| H                | 2.445628000  | -0.665377000 | -1.416607000 |
| H                | 1.944496000  | 0.643325000  | -0.366133000 |
| C                | 1.457502000  | 0.096831000  | -3.475505000 |
| C                | 1.056460000  | 2.018089000  | -2.093688000 |
| C                | -4.125797000 | -0.452490000 | -2.080648000 |
| C                | -3.487183000 | 1.570880000  | -0.958355000 |
| H                | 0.559153000  | 2.396963000  | -1.194981000 |
| H                | 0.610229000  | 2.503130000  | -2.962427000 |
| H                | 2.122906000  | 2.277517000  | -2.046796000 |
| H                | 1.371716000  | -0.987488000 | -3.550412000 |
| H                | 2.511317000  | 0.400968000  | -3.540214000 |
| H                | 0.902175000  | 0.536728000  | -4.306064000 |
| H                | -3.887514000 | -1.504918000 | -2.236654000 |
| H                | -4.112997000 | 0.043403000  | -3.053094000 |
| H                | -5.123845000 | -0.350227000 | -1.632698000 |
| C                | -0.440557000 | 0.564196000  | 1.091086000  |
| H                | -1.358732000 | 1.120826000  | 1.284890000  |
| H                | 0.342046000  | 1.288435000  | 0.859895000  |
| H                | -0.158214000 | 0.029966000  | 2.010332000  |
| H                | -2.707411000 | 2.075309000  | -0.378666000 |
| H                | -4.435940000 | 1.632027000  | -0.407963000 |
| H                | -3.594892000 | 2.089331000  | -1.911614000 |
| N                | -1.705067000 | 1.703901000  | -3.521624000 |

|    |              |              |              |
|----|--------------|--------------|--------------|
| C  | -1.988184000 | 1.747912000  | -4.637014000 |
| C  | -2.336896000 | 1.743324000  | -6.033987000 |
| H  | -1.618359000 | 2.331303000  | -6.609355000 |
| H  | -2.325727000 | 0.710523000  | -6.395585000 |
| H  | -3.334845000 | 2.162539000  | -6.180337000 |
| Br | -1.349407000 | -1.753654000 | -3.460056000 |

[Cu<sup>II</sup>(PMDETA)(MeCN)Cl]<sup>+</sup> isomer *I2*  
E=-2753.983813 a.u.

|                  |              |              |              |
|------------------|--------------|--------------|--------------|
| M06/6-311+G(d,p) |              |              |              |
| Cu               | 0.008050000  | -0.607145000 | -0.694151000 |
| N                | -2.046910000 | -0.519785000 | -0.263797000 |
| N                | 0.003685000  | 1.392460000  | -0.038792000 |
| N                | 2.061401000  | -0.518692000 | -0.260319000 |
| C                | -2.390579000 | 0.887624000  | 0.049386000  |
| C                | -1.230985000 | 1.566316000  | 0.744029000  |
| H                | -3.286748000 | 0.920567000  | 0.685520000  |
| H                | -2.653078000 | 1.399472000  | -0.881772000 |
| H                | -1.075967000 | 1.113709000  | 1.729499000  |
| H                | -1.430681000 | 2.635602000  | 0.905204000  |
| C                | 1.237028000  | 1.568150000  | 0.746566000  |
| C                | 2.400703000  | 0.890523000  | 0.054090000  |
| H                | 1.080945000  | 1.114768000  | 1.731502000  |
| H                | 1.434252000  | 2.637785000  | 0.908551000  |
| H                | 3.295220000  | 0.925301000  | 0.692464000  |
| H                | 2.664343000  | 1.403009000  | -0.876365000 |
| C                | 2.214322000  | -1.353270000 | 0.947504000  |
| C                | 2.948642000  | -1.025622000 | -1.321968000 |
| C                | -2.200983000 | -1.353923000 | 0.944157000  |
| C                | -2.931143000 | -1.027800000 | -1.328143000 |
| H                | 2.767570000  | -0.473006000 | -2.247423000 |
| H                | 2.737437000  | -2.079674000 | -1.502621000 |
| H                | 3.998661000  | -0.903023000 | -1.022013000 |
| H                | 1.568904000  | -0.988915000 | 1.753035000  |
| H                | 3.256722000  | -1.334009000 | 1.295591000  |
| H                | 1.929941000  | -2.380732000 | 0.711774000  |
| H                | -1.557867000 | -0.988084000 | 1.750867000  |
| H                | -1.914587000 | -2.381045000 | 0.709697000  |
| H                | -3.244190000 | -1.335868000 | 1.289818000  |
| C                | 0.002157000  | 2.325733000  | -1.175461000 |
| H                | -0.876583000 | 2.172524000  | -1.798540000 |
| H                | 0.882548000  | 2.178474000  | -1.794246000 |
| H                | -0.001120000 | 3.361357000  | -0.803518000 |
| H                | -2.748435000 | -0.474384000 | -2.252871000 |
| H                | -3.981878000 | -0.906078000 | -1.030275000 |
| H                | -2.711808000 | -2.083644000 | -1.486564000 |
| N                | 0.109919000  | 0.148426000  | -2.470549000 |
| C                | 0.182583000  | 0.531967000  | -3.782989000 |
| C                | 0.254308000  | 0.978566000  | -5.232555000 |
| H                | 1.294412000  | 1.104632000  | -5.552473000 |
| H                | -0.224865000 | 0.250706000  | -5.896442000 |
| H                | -0.248294000 | 1.942711000  | -5.368849000 |

Cl -0.051067000 -2.866865000 -1.456077000

[Cu<sup>II</sup>(PMDETA)(DMSO-κO)Br]<sup>+</sup> isomer *I1*  
E=-5288.246537 a.u.

M06/6-311+G(d,p)

|    |              |              |              |
|----|--------------|--------------|--------------|
| Cu | -1.237386000 | 0.584877000  | -2.142290000 |
| N  | -3.223315000 | 0.101207000  | -1.498006000 |
| N  | -0.881013000 | -1.402054000 | -1.749923000 |
| N  | 0.868036000  | 0.626721000  | -2.541145000 |
| C  | -3.272595000 | -1.371437000 | -1.302160000 |
| C  | -2.164382000 | -2.051268000 | -2.076950000 |
| H  | -4.250420000 | -1.762916000 | -1.609597000 |
| H  | -3.185605000 | -1.584206000 | -0.233041000 |
| H  | -2.321999000 | -1.930645000 | -3.153190000 |
| H  | -2.127724000 | -3.126760000 | -1.845473000 |
| C  | 0.195063000  | -1.746509000 | -2.698271000 |
| C  | 1.346185000  | -0.781639000 | -2.511645000 |
| H  | -0.219062000 | -1.653275000 | -3.706891000 |
| H  | 0.528486000  | -2.784993000 | -2.549106000 |
| H  | 2.104134000  | -0.940813000 | -3.288436000 |
| H  | 1.850679000  | -0.958997000 | -1.557695000 |
| C  | 1.129593000  | 1.215961000  | -3.865211000 |
| C  | 1.566244000  | 1.428666000  | -1.520302000 |
| C  | -4.203278000 | 0.501158000  | -2.521604000 |
| C  | -3.542307000 | 0.797062000  | -0.238402000 |
| H  | 1.337873000  | 1.048284000  | -0.520705000 |
| H  | 1.225936000  | 2.463618000  | -1.579113000 |
| H  | 2.653022000  | 1.389405000  | -1.679834000 |
| H  | 0.641533000  | 0.611495000  | -4.632539000 |
| H  | 2.212626000  | 1.254520000  | -4.049371000 |
| H  | 0.722439000  | 2.229072000  | -3.893121000 |
| H  | -4.051601000 | -0.088639000 | -3.426607000 |
| H  | -4.075760000 | 1.560700000  | -2.754955000 |
| H  | -5.223469000 | 0.331161000  | -2.149548000 |
| C  | -0.479760000 | -1.694869000 | -0.365449000 |
| H  | -1.248304000 | -1.375310000 | 0.338354000  |
| H  | 0.436248000  | -1.164676000 | -0.105389000 |
| H  | -0.310799000 | -2.773887000 | -0.237672000 |
| H  | -2.781433000 | 0.577489000  | 0.515935000  |
| H  | -4.524534000 | 0.476367000  | 0.136354000  |
| H  | -3.552313000 | 1.873935000  | -0.412317000 |
| O  | -1.673889000 | 0.031240000  | -4.419700000 |
| S  | -2.480107000 | 0.715723000  | -5.530638000 |
| C  | -1.958260000 | -0.131566000 | -7.037881000 |
| H  | -0.865323000 | -0.142052000 | -7.065863000 |
| H  | -2.348015000 | -1.149364000 | -7.000497000 |
| H  | -2.367904000 | 0.392770000  | -7.904608000 |
| C  | -1.677774000 | 2.298839000  | -5.870116000 |
| H  | -1.752018000 | 2.896486000  | -4.957693000 |
| H  | -0.632822000 | 2.133606000  | -6.142945000 |
| H  | -2.219934000 | 2.782380000  | -6.686798000 |
| Br | -1.550875000 | 2.917423000  | -2.162322000 |

[Cu<sup>II</sup>(PMDETA)(DMSO-κO)Br]<sup>+</sup> isomer *I2*  
E=-5288.253053 a.u.

M06/6-311+G(d,p)

|    |              |              |              |
|----|--------------|--------------|--------------|
| Cu | 0.583586000  | -0.205623000 | 0.040985000  |
| N  | 1.788997000  | -0.126003000 | 1.783472000  |
| N  | 2.413385000  | -0.619558000 | -0.937552000 |
| N  | -0.278638000 | -1.231478000 | -1.594669000 |
| C  | 3.192459000  | -0.176879000 | 1.325404000  |
| C  | 3.324535000  | -1.081963000 | 0.125058000  |
| H  | 3.849536000  | -0.510594000 | 2.142000000  |
| H  | 3.500665000  | 0.841690000  | 1.068729000  |
| H  | 3.048010000  | -2.108540000 | 0.389784000  |
| H  | 4.364503000  | -1.108633000 | -0.232891000 |
| C  | 2.113550000  | -1.674363000 | -1.924146000 |
| C  | 0.797542000  | -1.367797000 | -2.595715000 |
| H  | 2.061798000  | -2.633667000 | -1.398684000 |
| H  | 2.921249000  | -1.757506000 | -2.665808000 |
| H  | 0.540919000  | -2.146554000 | -3.329666000 |
| H  | 0.862174000  | -0.421004000 | -3.142293000 |
| C  | -0.724055000 | -2.554277000 | -1.121850000 |
| C  | -1.417187000 | -0.526289000 | -2.200970000 |
| C  | 1.478425000  | -1.307988000 | 2.609507000  |
| C  | 1.574611000  | 1.089547000  | 2.582849000  |
| H  | -1.104358000 | 0.482328000  | -2.482305000 |
| H  | -2.228563000 | -0.459131000 | -1.474268000 |
| H  | -1.769100000 | -1.066940000 | -3.091489000 |
| H  | 0.097950000  | -3.090544000 | -0.638942000 |
| H  | -1.095710000 | -3.155379000 | -1.964284000 |
| H  | -1.519608000 | -2.423055000 | -0.386916000 |
| H  | 1.614696000  | -2.227361000 | 2.032840000  |
| H  | 0.437550000  | -1.260377000 | 2.931360000  |
| H  | 2.136845000  | -1.338144000 | 3.489448000  |
| C  | 2.977569000  | 0.559592000  | -1.616402000 |
| H  | 3.123958000  | 1.374740000  | -0.908518000 |
| H  | 2.288104000  | 0.928107000  | -2.374787000 |
| H  | 3.937877000  | 0.295455000  | -2.081648000 |
| H  | 1.770261000  | 1.970548000  | 1.965175000  |
| H  | 2.250207000  | 1.101327000  | 3.450356000  |
| H  | 0.539330000  | 1.121260000  | 2.926300000  |
| O  | 0.523576000  | 1.843740000  | -0.804869000 |
| S  | -0.239449000 | 2.996855000  | -0.131289000 |
| C  | -1.878357000 | 3.005745000  | -0.886569000 |
| H  | -1.762076000 | 2.972746000  | -1.973256000 |
| H  | -2.401717000 | 2.123692000  | -0.514269000 |
| H  | -2.404038000 | 3.911942000  | -0.575713000 |
| C  | 0.400256000  | 4.460921000  | -0.972450000 |
| H  | 1.441582000  | 4.585734000  | -0.673207000 |
| H  | 0.331497000  | 4.301617000  | -2.051202000 |
| H  | -0.180563000 | 5.333803000  | -0.664781000 |
| Br | -1.471010000 | -0.054390000 | 1.258337000  |



[Cu<sup>II</sup>(PMDETA)(DMSO-κO)Br]<sup>+</sup> isomer I3  
E=-5288.246691 a.u.

|                  |              |              |              |
|------------------|--------------|--------------|--------------|
| M06/6-311+G(d,p) |              |              |              |
| Cu               | -1.125049000 | 0.567886000  | -1.704627000 |
| N                | -3.013318000 | -0.435123000 | -1.521061000 |
| N                | -0.620084000 | -0.506195000 | 0.042104000  |
| N                | 0.870695000  | 0.128279000  | -2.303323000 |
| C                | -3.036138000 | -0.886968000 | -0.118646000 |
| C                | -1.706957000 | -1.486165000 | 0.267471000  |
| H                | -3.849292000 | -1.612530000 | 0.041838000  |
| H                | -3.254185000 | -0.011774000 | 0.503862000  |
| H                | -1.502696000 | -2.376816000 | -0.334843000 |
| H                | -1.718991000 | -1.810158000 | 1.317118000  |
| C                | 0.672954000  | -1.170829000 | -0.238972000 |
| C                | 1.554833000  | -0.262473000 | -1.058808000 |
| H                | 0.473357000  | -2.097808000 | -0.785870000 |
| H                | 1.170052000  | -1.455179000 | 0.698718000  |
| H                | 2.516880000  | -0.750377000 | -1.280458000 |
| H                | 1.777786000  | 0.654988000  | -0.502839000 |
| C                | 0.864274000  | -0.958883000 | -3.290309000 |
| C                | 1.531540000  | 1.304291000  | -2.881097000 |
| C                | -3.068238000 | -1.560288000 | -2.461813000 |
| C                | -4.155779000 | 0.454508000  | -1.758723000 |
| H                | 1.436164000  | 2.152283000  | -2.197289000 |
| H                | 1.047633000  | 1.554725000  | -3.826339000 |
| H                | 2.595057000  | 1.095197000  | -3.068866000 |
| H                | 0.396196000  | -1.857264000 | -2.879055000 |
| H                | 1.888876000  | -1.209325000 | -3.603652000 |
| H                | 0.287362000  | -0.642205000 | -4.161702000 |
| H                | -2.240958000 | -2.254208000 | -2.291305000 |
| H                | -2.978838000 | -1.176870000 | -3.481285000 |
| H                | -4.015450000 | -2.111694000 | -2.362605000 |
| C                | -0.486649000 | 0.367424000  | 1.226052000  |
| H                | -1.424121000 | 0.888493000  | 1.420312000  |
| H                | 0.267915000  | 1.134281000  | 1.051529000  |
| H                | -0.208885000 | -0.241421000 | 2.097366000  |
| H                | -4.040640000 | 1.371402000  | -1.174096000 |
| H                | -5.097880000 | -0.045244000 | -1.488722000 |
| H                | -4.203426000 | 0.714606000  | -2.818859000 |
| O                | -1.509954000 | 1.069316000  | -3.610556000 |
| S                | -2.295116000 | 2.365545000  | -3.973194000 |
| C                | -2.835173000 | 1.958400000  | -5.644134000 |
| H                | -1.973659000 | 1.623117000  | -6.225636000 |
| H                | -3.571893000 | 1.156978000  | -5.561053000 |
| H                | -3.296798000 | 2.840929000  | -6.093308000 |
| C                | -1.039381000 | 3.581845000  | -4.404329000 |
| H                | -0.551504000 | 3.871438000  | -3.471793000 |
| H                | -0.337895000 | 3.134719000  | -5.113164000 |
| H                | -1.544056000 | 4.445300000  | -4.845738000 |
| Br               | -1.318796000 | 2.860414000  | -0.834898000 |

[Cu<sup>II</sup>(PMDETA)(DMSO-κO)Br]<sup>+</sup> isomer I4

E=-5288.234099 a.u.

|                  |              |              |              |
|------------------|--------------|--------------|--------------|
| M06/6-311+G(d,p) |              |              |              |
| Cu               | -1.192343000 | 0.060502000  | -2.191554000 |
| N                | -3.136258000 | 0.036508000  | -1.329738000 |
| N                | -0.630586000 | -0.801465000 | -0.358896000 |
| N                | 0.880178000  | 0.333433000  | -2.384145000 |
| C                | -3.041424000 | -0.783158000 | -0.085771000 |
| C                | -1.807225000 | -1.655271000 | -0.112016000 |
| H                | -3.940773000 | -1.399388000 | 0.024714000  |
| H                | -3.023084000 | -0.110643000 | 0.777215000  |
| H                | -1.874099000 | -2.378560000 | -0.932163000 |
| H                | -1.698527000 | -2.209573000 | 0.832515000  |
| C                | 0.554914000  | -1.559742000 | -0.797074000 |
| C                | 1.551141000  | -0.614226000 | -1.442401000 |
| H                | 0.218756000  | -2.298032000 | -1.532209000 |
| H                | 1.016273000  | -2.093177000 | 0.048075000  |
| H                | 2.301253000  | -1.200069000 | -1.982367000 |
| H                | 2.099033000  | -0.034640000 | -0.691784000 |
| C                | 1.375114000  | 0.124275000  | -3.755421000 |
| C                | 1.132570000  | 1.734621000  | -2.000909000 |
| C                | -4.171735000 | -0.534842000 | -2.211987000 |
| C                | -3.497566000 | 1.424050000  | -0.998667000 |
| H                | 0.737467000  | 1.935562000  | -1.001119000 |
| H                | 0.625553000  | 2.391650000  | -2.708925000 |
| H                | 2.210170000  | 1.949779000  | -2.005892000 |
| H                | 1.158113000  | -0.896655000 | -4.073596000 |
| H                | 2.456336000  | 0.316164000  | -3.795460000 |
| H                | 0.865792000  | 0.817977000  | -4.425994000 |
| H                | -3.934020000 | -1.574363000 | -2.440103000 |
| H                | -4.203939000 | 0.013384000  | -3.155086000 |
| H                | -5.152728000 | -0.467810000 | -1.720840000 |
| C                | -0.323255000 | 0.018443000  | 0.820613000  |
| H                | -1.124378000 | 0.729038000  | 1.030426000  |
| H                | 0.592959000  | 0.588237000  | 0.667531000  |
| H                | -0.182961000 | -0.623100000 | 1.702637000  |
| H                | -2.708290000 | 1.889489000  | -0.400178000 |
| H                | -4.441502000 | 1.458075000  | -0.436836000 |
| H                | -3.609649000 | 2.003353000  | -1.916838000 |
| O                | -1.512865000 | 1.674655000  | -3.461661000 |
| S                | -2.456433000 | 1.538136000  | -4.682181000 |
| C                | -1.400400000 | 1.153973000  | -6.089169000 |
| H                | -0.574817000 | 1.870073000  | -6.119772000 |
| H                | -1.050080000 | 0.129485000  | -5.946025000 |
| H                | -2.007081000 | 1.217989000  | -6.996218000 |
| C                | -2.793361000 | 3.261659000  | -5.084842000 |
| H                | -3.389779000 | 3.677576000  | -4.271370000 |
| H                | -1.843004000 | 3.793616000  | -5.168482000 |
| H                | -3.356126000 | 3.305868000  | -6.020306000 |
| Br               | -1.474079000 | -1.818979000 | -3.821144000 |

[Cu<sup>II</sup>(PMDETA)(DMSO-κO)Cl]<sup>+</sup> isomer I2  
E=-3174.429261 a.u.

|                  |              |              |              |
|------------------|--------------|--------------|--------------|
| M06/6-311+G(d,p) |              |              |              |
| Cu               | 0.393779000  | 0.034107000  | -0.317246000 |
| N                | 1.036932000  | -1.959046000 | -0.577511000 |
| N                | 1.620982000  | -0.010168000 | 1.384725000  |
| N                | 0.739035000  | 2.110546000  | -0.265199000 |
| C                | 1.765027000  | -2.330280000 | 0.651705000  |
| C                | 2.539579000  | -1.147014000 | 1.180554000  |
| H                | 2.434289000  | -3.182132000 | 0.460366000  |
| H                | 1.029981000  | -2.664970000 | 1.390757000  |
| H                | 3.305477000  | -0.841025000 | 0.459588000  |
| H                | 3.058716000  | -1.403547000 | 2.115622000  |
| C                | 2.325755000  | 1.286960000  | 1.413104000  |
| C                | 1.361375000  | 2.388077000  | 1.043222000  |
| H                | 3.151878000  | 1.244857000  | 0.695572000  |
| H                | 2.768151000  | 1.469132000  | 2.403095000  |
| H                | 1.868261000  | 3.364699000  | 1.029424000  |
| H                | 0.558083000  | 2.454591000  | 1.784621000  |
| C                | 1.660040000  | 2.434411000  | -1.368810000 |
| C                | -0.487237000 | 2.907195000  | -0.407961000 |
| C                | 1.939601000  | -1.983259000 | -1.743334000 |
| C                | -0.071409000 | -2.896754000 | -0.807527000 |
| H                | -1.195561000 | 2.616305000  | 0.371675000  |
| H                | -0.930614000 | 2.710698000  | -1.385566000 |
| H                | -0.258278000 | 3.978998000  | -0.318951000 |
| H                | 2.578752000  | 1.845752000  | -1.291812000 |
| H                | 1.920010000  | 3.502571000  | -1.347875000 |
| H                | 1.179420000  | 2.191249000  | -2.317740000 |
| H                | 2.770794000  | -1.286504000 | -1.601723000 |
| H                | 1.385951000  | -1.677194000 | -2.631846000 |
| H                | 2.344650000  | -2.995070000 | -1.887859000 |
| C                | 0.848134000  | -0.193349000 | 2.626094000  |
| H                | 0.261446000  | -1.110133000 | 2.577967000  |
| H                | 0.137546000  | 0.622174000  | 2.754943000  |
| H                | 1.531806000  | -0.233169000 | 3.485689000  |
| H                | -0.763294000 | -2.857716000 | 0.038160000  |
| H                | 0.310212000  | -3.922546000 | -0.913353000 |
| H                | -0.604718000 | -2.609811000 | -1.715329000 |
| O                | -1.462885000 | -0.036148000 | 0.897260000  |
| S                | -2.786178000 | -0.586456000 | 0.338605000  |
| C                | -3.609267000 | 0.807708000  | -0.459095000 |
| H                | -3.614508000 | 1.653937000  | 0.233268000  |
| H                | -3.040394000 | 1.032515000  | -1.362973000 |
| H                | -4.627749000 | 0.508675000  | -0.719116000 |
| C                | -3.847042000 | -0.667699000 | 1.796843000  |
| H                | -3.455175000 | -1.449150000 | 2.448804000  |
| H                | -3.817043000 | 0.300010000  | 2.303266000  |
| H                | -4.864099000 | -0.918981000 | 1.486474000  |
| Cl               | -0.640449000 | 0.100815000  | -2.310803000 |

### Coordinates of the species Cu<sup>I,II</sup> and Cu<sup>I,II</sup>S

Cu<sup>I</sup>  
E=-1640.078959 a.u.

Cu<sup>II</sup>  
E=-1639.306981 a.u.

Cu<sup>I</sup>(MeCN)  
E=-1772.867569 a.u.

|                  |             |             |              |
|------------------|-------------|-------------|--------------|
| M06/6-311+G(d,p) |             |             |              |
| Cu               | 0.290086000 | 0.967682000 | -0.041884000 |
| N                | 1.671655000 | 2.223177000 | -0.081921000 |
| C                | 2.521136000 | 2.995109000 | -0.106547000 |
| C                | 3.582759000 | 3.959855000 | -0.137864000 |
| H                | 4.226954000 | 3.829285000 | 0.735585000  |
| H                | 3.164989000 | 4.969966000 | -0.127936000 |
| H                | 4.177282000 | 3.826266000 | -1.045423000 |

Cu<sup>I</sup>(DMSO-κOα)  
E=-2193.304916 a.u.

|                  |             |             |              |
|------------------|-------------|-------------|--------------|
| M06/6-311+G(d,p) |             |             |              |
| Cu               | 1.548769000 | 2.519347000 | 0.866135000  |
| O                | 2.725743000 | 3.914622000 | 1.238102000  |
| S                | 2.527166000 | 5.438612000 | 1.512740000  |
| C                | 3.693353000 | 6.185526000 | 0.367623000  |
| H                | 3.781076000 | 7.248316000 | 0.606314000  |
| H                | 3.296839000 | 6.064655000 | -0.640874000 |
| H                | 4.652285000 | 5.672578000 | 0.471513000  |
| C                | 3.456891000 | 5.674520000 | 3.032318000  |
| H                | 2.898961000 | 5.204813000 | 3.842866000  |
| H                | 3.549216000 | 6.747258000 | 3.219133000  |
| H                | 4.435731000 | 5.204592000 | 2.911899000  |

Cu<sup>I</sup>(DMSO-κOβ)  
E=-2193.302745 a.u.

|                  |             |             |              |
|------------------|-------------|-------------|--------------|
| M06/6-311+G(d,p) |             |             |              |
| Cu               | 2.758006000 | 2.628928000 | 0.996332000  |
| O                | 1.963226000 | 4.300541000 | 1.154149000  |
| S                | 2.373067000 | 5.757389000 | 1.478583000  |
| C                | 3.745842000 | 6.109203000 | 0.370676000  |
| H                | 4.149444000 | 7.095796000 | 0.612482000  |
| H                | 3.354565000 | 6.114675000 | -0.647541000 |
| H                | 4.511836000 | 5.337343000 | 0.493809000  |
| C                | 3.298620000 | 5.645753000 | 3.016968000  |
| H                | 2.603230000 | 5.336015000 | 3.798245000  |
| H                | 3.702409000 | 6.632633000 | 3.257282000  |
| H                | 4.105786000 | 4.916564000 | 2.896787000  |

Cu<sup>I</sup>(DMSO-κS)  
E=-2193.271572 a.u.

|                  |             |             |              |
|------------------|-------------|-------------|--------------|
| M06/6-311+G(d,p) |             |             |              |
| O                | 1.728493000 | 5.232454000 | 0.025120000  |
| S                | 2.532698000 | 6.306913000 | 0.621434000  |
| C                | 4.257882000 | 6.153698000 | 0.141675000  |
| H                | 4.840031000 | 6.940312000 | 0.629495000  |
| H                | 4.308913000 | 6.243153000 | -0.944365000 |
| H                | 4.590694000 | 5.159274000 | 0.452235000  |
| C                | 2.655477000 | 6.098577000 | 2.402211000  |
| H                | 1.646158000 | 6.151487000 | 2.812737000  |
| H                | 3.290651000 | 6.887076000 | 2.815070000  |
| H                | 3.081712000 | 5.107409000 | 2.581165000  |
| Cu               | 1.809151000 | 8.366738000 | 0.156893000  |

Cu<sup>II</sup>(MeCN)  
E=-1772.265184 a.u.

|                  |             |             |              |
|------------------|-------------|-------------|--------------|
| M06/6-311+G(d,p) |             |             |              |
| Cu               | 0.335392000 | 0.941527000 | -0.072188000 |
| N                | 1.609018000 | 2.285635000 | -0.050722000 |
| C                | 2.539122000 | 2.998509000 | -0.096315000 |
| C                | 3.590094000 | 3.919375000 | -0.117617000 |
| H                | 4.238686000 | 3.822170000 | 0.764453000  |
| H                | 3.177846000 | 4.960481000 | -0.154270000 |
| H                | 4.144703000 | 3.843641000 | -1.079334000 |

Cu<sup>II</sup>(DMSO-κOα)  
E=-2192.770736 a.u.

|                  |             |             |              |
|------------------|-------------|-------------|--------------|
| M06/6-311+G(d,p) |             |             |              |
| Cu               | 1.718353000 | 2.404387000 | 0.859055000  |
| O                | 2.606463000 | 3.976513000 | 1.239350000  |
| S                | 2.467589000 | 5.598173000 | 1.538392000  |
| C                | 3.700369000 | 6.181543000 | 0.337855000  |
| H                | 3.839114000 | 7.241656000 | 0.594222000  |
| H                | 3.265499000 | 6.093775000 | -0.659528000 |
| H                | 4.626658000 | 5.614318000 | 0.458636000  |
| C                | 3.459837000 | 5.659091000 | 3.059263000  |
| H                | 2.865566000 | 5.225052000 | 3.865513000  |
| H                | 3.605434000 | 6.734122000 | 3.237939000  |
| H                | 4.411149000 | 5.146211000 | 2.897073000  |

Cu<sup>II</sup>(DMSO-κS)  
E=-2192.730843 a.u.

|                  |             |             |             |
|------------------|-------------|-------------|-------------|
| M06/6-311+G(d,p) |             |             |             |
| O                | 1.814935000 | 5.231861000 | 0.086226000 |
| S                | 2.611359000 | 6.498337000 | 0.681568000 |
| C                | 4.312967000 | 6.125380000 | 0.117431000 |
| H                | 4.952137000 | 6.872437000 | 0.605087000 |

|    |             |             |              |
|----|-------------|-------------|--------------|
| H  | 4.331052000 | 6.225326000 | -0.970749000 |
| H  | 4.530799000 | 5.104382000 | 0.447773000  |
| C  | 2.651667000 | 6.068581000 | 2.461033000  |
| H  | 1.628974000 | 6.132904000 | 2.841044000  |
| H  | 3.306330000 | 6.816165000 | 2.926842000  |
| H  | 3.058798000 | 5.054063000 | 2.524343000  |
| Cu | 1.542841000 | 8.517657000 | -0.026930000 |

### Coordinates of initiators RX and radicals R• and X•

Allyl chloride (AlCl)  
E=-577.425082 a.u.

|                  |              |              |              |
|------------------|--------------|--------------|--------------|
| M06/6-311+G(d,p) |              |              |              |
| C                | -4.740388000 | 0.119376000  | -1.129340000 |
| C                | -4.101009000 | 0.543842000  | -0.051675000 |
| C                | -2.837534000 | 1.327071000  | 0.004131000  |
| H                | -5.660152000 | -0.447993000 | -1.042497000 |
| H                | -4.369285000 | 0.321752000  | -2.129069000 |
| H                | -4.504149000 | 0.320438000  | 0.937193000  |
| Cl               | -2.132471000 | 1.718351000  | -1.600538000 |
| H                | -2.066468000 | 0.781265000  | 0.555909000  |
| H                | -2.995236000 | 2.282343000  | 0.513561000  |

Allyl bromide (AlBr)  
E=-2691.251663 a.u.

|                  |              |             |              |
|------------------|--------------|-------------|--------------|
| M06/6-311+G(d,p) |              |             |              |
| C                | -4.944269000 | 0.517495000 | 1.132482000  |
| C                | -4.217360000 | 0.769926000 | 0.056110000  |
| C                | -2.823900000 | 1.285778000 | -0.011592000 |
| H                | -5.956984000 | 0.140574000 | 1.043252000  |
| H                | -4.556768000 | 0.677091000 | 2.133976000  |
| H                | -4.648787000 | 0.594546000 | -0.931250000 |
| Br               | -1.979044000 | 1.626147000 | 1.709875000  |
| H                | -2.783122000 | 2.233506000 | -0.555173000 |
| H                | -2.169045000 | 0.579246000 | -0.528609000 |

Ethyl α-chloroisobutyrate (EtCl<sup>i</sup>Bu)  
E=-845.779045 a.u.

|                  |              |             |              |
|------------------|--------------|-------------|--------------|
| M06/6-311+G(d,p) |              |             |              |
| C                | -2.179093386 | 3.083552853 | -0.209001676 |
| C                | -0.799398386 | 2.813699853 | 0.319910324  |
| H                | -2.177648386 | 3.119215853 | -1.301626676 |
| H                | -2.562890386 | 4.036482853 | 0.165599324  |
| H                | -2.862895386 | 2.291347853 | 0.107694324  |
| O                | 0.050451614  | 3.880992853 | -0.130766676 |
| H                | -0.390918386 | 1.865468853 | -0.046052676 |
| H                | -0.770691386 | 2.780045853 | 1.414524324  |

|    |             |             |              |
|----|-------------|-------------|--------------|
| C  | 1.331695614 | 3.800056853 | 0.223294324  |
| O  | 1.786979614 | 2.938691853 | 0.923896324  |
| C  | 2.154727614 | 4.941046853 | -0.369311676 |
| C  | 1.443986614 | 6.274265853 | -0.305500676 |
| H  | 0.484936614 | 6.244501853 | -0.823431676 |
| H  | 2.071252614 | 7.047774853 | -0.757301676 |
| H  | 1.267094614 | 6.542867853 | 0.743184324  |
| C  | 3.526008614 | 4.989363853 | 0.258269324  |
| H  | 4.129748614 | 5.757459853 | -0.232120676 |
| H  | 4.032387614 | 4.026326853 | 0.180336324  |
| H  | 3.432213614 | 5.239522853 | 1.321050324  |
| Cl | 2.359815000 | 4.487512000 | -2.137332000 |

#### Ethyl $\alpha$ -bromoisobutyrate (EtBr<sup>+</sup>Bu)

E=-2959.604733 a.u.

|                  |              |             |              |
|------------------|--------------|-------------|--------------|
| M06/6-311+G(d,p) |              |             |              |
| C                | -2.183970000 | 3.105715000 | -0.177356000 |
| C                | -0.794016000 | 2.807114000 | 0.307683000  |
| H                | -2.207841000 | 3.186376000 | -1.267336000 |
| H                | -2.553225000 | 4.044259000 | 0.245118000  |
| H                | -2.865067000 | 2.304646000 | 0.122385000  |
| O                | 0.052055000  | 3.886571000 | -0.119676000 |
| H                | -0.400636000 | 1.872074000 | -0.105878000 |
| H                | -0.740548000 | 2.728512000 | 1.398977000  |
| C                | 1.340619000  | 3.786360000 | 0.207391000  |
| O                | 1.800850000  | 2.897668000 | 0.870413000  |
| C                | 2.161079000  | 4.936612000 | -0.360104000 |
| C                | 1.434824000  | 6.263573000 | -0.335529000 |
| H                | 0.490140000  | 6.223365000 | -0.878307000 |
| H                | 2.066150000  | 7.040492000 | -0.775753000 |
| H                | 1.225369000  | 6.541463000 | 0.705377000  |
| C                | 3.512724000  | 5.009096000 | 0.309278000  |
| H                | 4.124765000  | 5.780307000 | -0.165699000 |
| H                | 4.035657000  | 4.053038000 | 0.262092000  |
| H                | 3.378852000  | 5.270114000 | 1.366092000  |
| Br               | 2.449957000  | 4.422805000 | -2.263917000 |

#### Methyl 2-chloropropionate (MeClPr)

E=-767.187118 a.u.

|                  |              |              |              |
|------------------|--------------|--------------|--------------|
| M06/6-311+G(d,p) |              |              |              |
| C                | 0.789760000  | 2.089705000  | -0.269309000 |
| C                | 0.252419000  | 0.724733000  | -0.593739000 |
| H                | 0.119294000  | 2.856450000  | -0.671787000 |
| H                | 1.780759000  | 2.224539000  | -0.707505000 |
| H                | 0.851945000  | 2.227386000  | 0.812407000  |
| C                | -1.096522000 | 0.461897000  | 0.041955000  |
| O                | -1.519954000 | 1.036061000  | 1.005243000  |
| O                | -1.746699000 | -0.499077000 | -0.615456000 |
| C                | -3.004412000 | -0.882144000 | -0.063846000 |
| H                | -3.691971000 | -0.033027000 | -0.048485000 |
| H                | -2.876454000 | -1.252211000 | 0.956170000  |

|    |              |              |              |
|----|--------------|--------------|--------------|
| H  | -3.387776000 | -1.670849000 | -0.708738000 |
| H  | 0.192710000  | 0.534614000  | -1.667718000 |
| Cl | 1.366131000  | -0.556864000 | 0.049176000  |

#### Methyl 2-Bromopropionate (MeBrPr)

E=-2881.014146 a.u.

|                  |              |              |              |
|------------------|--------------|--------------|--------------|
| M06/6-311+G(d,p) |              |              |              |
| C                | -4.641238000 | 1.883956000  | 0.038386000  |
| C                | -3.435860000 | 0.992646000  | 0.157187000  |
| H                | -4.570159000 | 2.699644000  | 0.766585000  |
| H                | -5.557748000 | 1.322516000  | 0.230855000  |
| H                | -4.694983000 | 2.326974000  | -0.958546000 |
| C                | -2.144555000 | 1.708871000  | -0.157462000 |
| O                | -2.059379000 | 2.697577000  | -0.830962000 |
| O                | -1.108615000 | 1.093418000  | 0.417276000  |
| C                | 0.173429000  | 1.646680000  | 0.130985000  |
| H                | 0.231584000  | 2.682021000  | 0.475509000  |
| H                | 0.369120000  | 1.620189000  | -0.943700000 |
| H                | 0.893625000  | 1.027685000  | 0.663176000  |
| Br               | -3.555555000 | -0.492987000 | -1.130560000 |
| H                | -3.358177000 | 0.502079000  | 1.129270000  |

#### Allyl radical (Al<sup>•</sup>)

E=-117.187827 a.u.

|                  |            |            |  |
|------------------|------------|------------|--|
| M06/6-311+G(d,p) |            |            |  |
| C1.2191470       | 0.1963370  | -0.0000050 |  |
| C 0.0000110      | -0.4467790 | 0.0000140  |  |
| C-1.2192100      | 0.1963580  | -0.0000310 |  |
| H 2.1545350      | -0.3512910 | -0.0000140 |  |
| H 1.2730700      | 1.2819080  | -0.0000220 |  |
| H 0.0001100      | -1.5366430 | 0.0000550  |  |
| H-1.2728930      | 1.2819250  | 0.0001400  |  |
| H-2.1545080      | -0.3513990 | -0.0000230 |  |

#### Ethyl $\alpha$ -isobutyrate radical (Et<sup>•</sup>Bu<sup>•</sup>)

E=-385.536270 a.u.

|                  |              |             |              |
|------------------|--------------|-------------|--------------|
| M06/6-311+G(d,p) |              |             |              |
| C                | -2.243788000 | 3.113632000 | -0.084827000 |
| C                | -0.817230000 | 2.749109000 | 0.218671000  |
| H                | -2.345742000 | 3.471135000 | -1.113380000 |
| H                | -2.597601000 | 3.900283000 | 0.587529000  |
| H                | -2.890599000 | 2.240655000 | 0.039475000  |
| O                | -0.025519000 | 3.925899000 | 0.041920000  |
| H                | -0.441895000 | 1.962065000 | -0.445779000 |
| H                | -0.693713000 | 2.385429000 | 1.245445000  |
| C                | 1.299927000  | 3.784798000 | 0.273715000  |
| O                | 1.795728000  | 2.731251000 | 0.615309000  |
| C                | 2.033505000  | 5.019786000 | 0.069354000  |
| C                | 1.365579000  | 6.279768000 | -0.334831000 |
| H                | 0.451562000  | 6.103133000 | -0.904358000 |

|   |             |             |              |
|---|-------------|-------------|--------------|
| H | 2.045767000 | 6.906860000 | -0.922153000 |
| H | 1.081585000 | 6.870322000 | 0.550242000  |
| C | 3.488838000 | 5.029003000 | 0.335828000  |
| H | 4.049048000 | 5.282827000 | -0.575514000 |
| H | 3.837292000 | 4.062827000 | 0.702938000  |
| H | 3.743087000 | 5.805548000 | 1.071247000  |

Methyl 2-propionate radical (MePr<sup>•</sup>)

E=-306.942176 a.u.

M06/6-311+G(d,p)

|   |              |              |              |
|---|--------------|--------------|--------------|
| C | -2.057058000 | 0.578981000  | 0.517634000  |
| C | -0.664321000 | 0.547381000  | 0.043460000  |
| H | -0.038145000 | 1.257160000  | 0.600511000  |
| H | -0.595785000 | 0.849007000  | -1.010340000 |
| H | -0.240830000 | -0.453474000 | 0.150460000  |
| C | -2.697771000 | -0.606795000 | 1.039596000  |
| O | -2.182928000 | -1.698839000 | 1.137757000  |
| O | -3.971055000 | -0.353944000 | 1.416372000  |
| C | -4.681007000 | -1.464837000 | 1.943044000  |
| H | -4.185435000 | -1.856172000 | 2.835955000  |
| H | -4.749476000 | -2.268895000 | 1.204932000  |
| H | -5.675445000 | -1.097840000 | 2.194153000  |
| H | -2.639875000 | 1.495165000  | 0.487605000  |

Br<sup>•</sup>

E=-2573.975675 a.u.

Cl<sup>•</sup>

E=-460.126597 a.u.
